# Supplementary material for: Glutamatergic and N-Acetylaspartate Metabolites in Bipolar Disorder: A Systematic Review and Meta-Analysis of Proton Magnetic Resonance Spectroscopy Studies
Source: MDPI journal article supplement (doi:10.3390/ijms23168974), 2022-08-11

## **SUPPLEMENTARY TABLES:**

**Supplementary Table S1: The Newcastle-Ottawa Scale (NOS) results:**

|                            | <u>Selection:</u>           |                            |                                  |                                   | <u>Comparability:</u> |                      |               |
|----------------------------|-----------------------------|----------------------------|----------------------------------|-----------------------------------|-----------------------|----------------------|---------------|
| <u>Study and year:</u>     | <u>Case<br/>definition:</u> | <u>Representativeness:</u> | <u>Selection of<br/>control:</u> | <u>Definition of<br/>control:</u> | <u>Age:</u>           | <u>Other factor:</u> | <u>Total:</u> |
| Rocha (2015)               | 1                           | 0                          | 1                                | 1                                 | 0                     | 0                    | 3             |
| Winberg (2000)             | 1                           | 1                          | 1                                | 1                                 | 0                     | 1                    | 5             |
| Senaratne (2009)           | 1                           | 1                          | 1                                | 1                                 | 1                     | 1                    | 6             |
| Scherk (2009)              | 1                           | 0                          | 1                                | 1                                 | 0                     | 0                    | 3             |
| Molina (2007)              | 1                           | 1                          | 1                                | 1                                 | 0                     | 0                    | 4             |
| Kalayci (2012)             | 1                           | 0                          | 1                                | 1                                 | 1                     | 1                    | 5             |
| Cumurcu (2008)             | 1                           | 0                          | 1                                | 1                                 | 0                     | 0                    | 3             |
| Corcoran (2020)            | 1                           | 1                          | 1                                | 1                                 | 0                     | 0                    | 4             |
| Mahli (2007)               | 1                           | 0                          | 1                                | 1                                 | 1                     | 1                    | 5             |
| Ehrlich (2015)             | 1                           | 0                          | 1                                | 1                                 | 1                     | 1                    | 5             |
| Soiero-De Souza (2015)     | 1                           | 0                          | 1                                | 1                                 | 0                     | 0                    | 3             |
| Soiero-De Souza (2018 [1]) | 1                           | 1                          | 1                                | 1                                 | 0                     | 0                    | 4             |
| Soeiro-De-Souza 20(18 [2]) | 1                           | 1                          | 1                                | 1                                 | 0                     | 0                    | 4             |
| Amaral (2006)              | 1                           | 0                          | 1                                | 1                                 | 0                     | 1                    | 4             |
| Brady (2012)               | 1                           | 0                          | 1                                | 1                                 | 0                     | 1                    | 4             |
| Kubo (2016)                | 1                           | 1                          | 1                                | 1                                 | 1                     | 1                    | 6             |
| Iosifescu (2009)           | 1                           | 0                          | 1                                | 1                                 | 1                     | 1                    | 5             |
| Colla (2009)               | 1                           | 1                          | 1                                | 1                                 | 1                     | 1                    | 6             |
| Haarman (2016)             | 1                           | 1                          | 1                                | 1                                 | 1                     | 1                    | 6             |
| Scherk (2008)              | 1                           | 0                          | 1                                | 1                                 | 1                     | 1                    | 5             |
| Deicken (2003)             | 1                           | 0                          | 1                                | 1                                 | 0                     | 1                    | 4             |
| Liu (2017)                 | 1                           | 0                          | 1                                | 1                                 | 1                     | 1                    | 5             |
| Michael (2009)             | 1                           | 0                          | 1                                | 1                                 | 1                     | 1                    | 5             |
| Li (2016)                  | 1                           | 0                          | 1                                | 1                                 | 1                     | 1                    | 5             |

|                        |   |   |   |   |   |   |   |
|------------------------|---|---|---|---|---|---|---|
| Smaragdi (2019)        | 1 | 1 | 1 | 1 | 0 | 0 | 4 |
| Zhong (2014)           | 1 | 0 | 1 | 1 | 1 | 1 | 5 |
| Zhong (2018)           | 1 | 0 | 1 | 1 | 1 | 1 | 5 |
| Lai (2019)             | 1 | 0 | 1 | 1 | 1 | 1 | 5 |
| Croarkin (2015)        | 1 | 1 | 1 | 1 | 0 | 0 | 4 |
| Mellen (2019)          | 1 | 1 | 1 | 1 | 0 | 0 | 4 |
| Zanetti (2014)         | 1 | 0 | 1 | 1 | 0 | 0 | 3 |
| Atmaca (2012)          | 1 | 0 | 1 | 1 | 0 | 0 | 3 |
| Soeiro-De-Souza (2021) | 1 | 1 | 1 | 1 | 1 | 1 | 6 |

**Supplementary Table S2: Excluded studies:**

| <b>Name of the study</b>                                                                                                                                                                                                                                                                                                                                                                                                                  | <b>First autor</b> | <b>Reason for exclusion</b>                                    |
|-------------------------------------------------------------------------------------------------------------------------------------------------------------------------------------------------------------------------------------------------------------------------------------------------------------------------------------------------------------------------------------------------------------------------------------------|--------------------|----------------------------------------------------------------|
| Lithium increases N-acetyl-aspartate in the human brain: in vivo evidence in support of bcl-2's neurotrophic effects? [73]                                                                                                                                                                                                                                                                                                                | Moore              | Missing data                                                   |
| Chronic treatment with both lithium and sodium valproate may normalize phosphoinositol cycle activity in bipolar patients. [83]                                                                                                                                                                                                                                                                                                           | Silverstone        | Not about Glu, Glx, Gln, NAA (on myo-I)                        |
| Brain choline concentrations may not be altered in euthymic bipolar disorder patients chronically treated with either lithium or sodium valproate. [84]                                                                                                                                                                                                                                                                                   | Wu                 | Not about Glu, Glx, Gln, NAA (on Cho)                          |
| Brain metabolic alterations in medication-free patients with bipolar disorder. [85]                                                                                                                                                                                                                                                                                                                                                       | Dager              | Not different groups for each mood states or lack of precision |
| Lithium and valproic acid treatment effects on brain chemistry in bipolar disorder. [86]                                                                                                                                                                                                                                                                                                                                                  | Friedman           | Not different groups for each mood states or lack of precision |
| 1H magnetic resonance spectroscopy investigation of the dorsolateral prefrontal cortex in bipolar disorder patients. [87]                                                                                                                                                                                                                                                                                                                 | Brambilla          | Not different groups for each mood states or lack of precision |
| Metabolic alterations in medication-free patients with bipolar disorder: a 3T CSF-corrected magnetic resonance spectroscopic imaging study. [88]                                                                                                                                                                                                                                                                                          | Port               | Not different groups for each mood states or lack of precision |
| Brain GABA levels in patients with bipolar disorder. [89]                                                                                                                                                                                                                                                                                                                                                                                 | Kaufman            | Not different groups for each mood states or lack of precision |
| Bipolar disorder comorbid with alcoholism: a 1H magnetic resonance spectroscopy study. [90]                                                                                                                                                                                                                                                                                                                                               | Nery               | Not different groups for each mood states or lack of precision |
| T2 relaxation time abnormalities in bipolar disorder and schizophrenia. [91]                                                                                                                                                                                                                                                                                                                                                              | Ongur              | Not different groups for each mood states or lack of precision |
| Brain-derived neurotrophic factor val66met polymorphism affects prefrontal energy metabolism in bipolar disorder. [92]                                                                                                                                                                                                                                                                                                                    | Frey               | Not different groups for each mood states or lack of precision |
| 1) Abnormal cellular energy and phospholipid metabolism in the left dorsolateral prefrontal cortex of medication-free individuals with bipolar disorder: an in vivo 1H MRS study. [93]<br>2) Corrected values of brain metabolites for the article: 'Abnormal cellular energy and phospholipid metabolism in the left dorsolateral prefrontal cortex of medication-free individuals with bipolar disorder: an in vivo 1H MRS study'. [94] | Frey               | Not different groups for each mood states or lack of precision |
| In vivo glutathione levels in young persons with bipolar disorder: a magnetic resonance spectroscopy study. [95]                                                                                                                                                                                                                                                                                                                          | Lagopoulos         | Not about Glu, Glx, Gln, NAA (on GSH)                          |
| Investigating the role of glutathione in mismatch negativity: An insight into NMDA receptor disturbances in bipolar disorder. [96]                                                                                                                                                                                                                                                                                                        | Chitty             | Not about Glu, Glx, Gln, NAA (on GSH)                          |
| Perisylvian GABA levels in schizophrenia and bipolar disorder. [97]                                                                                                                                                                                                                                                                                                                                                                       | Atagun             | Not about Glu, Glx, Gln, NAA (on GABA)                         |
| Increased Brain Lactate During Depressive Episodes and Reversal Effects by Lithium Monotherapy in Drug-Naive Bipolar Disorder: A 3-T 1H-MRS Study. [98]                                                                                                                                                                                                                                                                                   | Machado-Vieira     | Not about Glu, Glx, Gln, NAA (on Lactate)                      |
| Neurochemical metabolites in the medial prefrontal cortex in bipolar disorder: A proton magnetic resonance spectroscopy study. [99]                                                                                                                                                                                                                                                                                                       | Ozdel              | Non-exclusion of comorbidities                                 |
| Hippocampal neurochemical markers in bipolar disorder patients following the first-manic episode: A prospective 12-month proton magnetic resonance spectroscopy study. [100]                                                                                                                                                                                                                                                              | Silveira           | Pediatric population included                                  |

|                                                                                                                                                                                           |              |                                                                |
|-------------------------------------------------------------------------------------------------------------------------------------------------------------------------------------------|--------------|----------------------------------------------------------------|
| Evidence of altered membrane phospholipid metabolism in the anterior cingulate cortex and striatum of patients with bipolar disorder I: A multi-voxel (1)H MRS study. [101]               | Cao          | Not different groups for each mood states or lack of precision |
| Trait-related alterations of N-acetylaspartate in euthymic bipolar patients: A longitudinal proton magnetic resonance spectroscopy study. [102]                                           | Aydin        | Non-exclusion of comorbidities                                 |
| Neurochemical alterations in anterior cingulate cortex in bipolar disorder: a proton magnetic resonance spectroscopy study (1H-MRS). [103]                                                | Galinska     | Not different groups for each mood states or lack of precision |
| Elevated Choline-Containing Compound Levels in Rapid Cycling Bipolar Disorder. [104]                                                                                                      | Cao          | Not different groups for each mood states or lack of precision |
| Diagnosis and body mass index effects on hippocampal volumes and neurochemistry in bipolar disorder. [105]                                                                                | Bond         | Pediatric population included                                  |
| Unique prefrontal GABA and glutamate disturbances in co-occurring bipolar disorder and alcohol dependence. [106]                                                                          | Prisciandaro | Not different groups for each mood states or lack of precision |
| In Vivo Brain Glycine and Glutamate Concentrations in Patients With First-Episode Psychosis Measured by Echo Time-Averaged Proton Magnetic Resonance Spectroscopy at 4T. [107]            | Kim          | Non-exclusion of comorbidities                                 |
| Choline Compounds of the Frontal Lobe and Temporal Glutamatergic System in Bipolar and Schizophrenia Proton Magnetic Resonance Spectroscopy Study. [108]                                  | Galinska     | Not different groups for each mood states or lack of precision |
| In vivo imaging of oxidative stress and fronto-limbic white matter integrity in young adults with mood disorders. [109]                                                                   | Hermens      | Not about Glu, Glx, Gln, NAA (on GSH)                          |
| Type 2 diabetes mellitus: a potentially modifiable risk factor for neurochemical brain changes in bipolar disorders. [110]                                                                | Hajek        | Not different groups for each mood states or lack of precision |
| Inflammation, Glutamate, and Cognition in Bipolar Disorder Type II: A Proof of Concept Study. [111]                                                                                       | King         | Not different groups for each mood states or lack of precision |
| Proton magnetic resonance spectroscopic imaging of gray and white matter in bipolar-I and schizophrenia. [112]                                                                            | Bustillo     | Not different groups for each mood states or lack of precision |
| Proton magnetic resonance spectroscopy of the brain in schizophrenic and affective patients. [113]                                                                                        | Sharma       | Not different groups for each mood states or lack of precision |
| The human brain resonance of choline-containing compounds is similar in patients receiving lithium treatment and controls: an in vivo proton magnetic resonance spectroscopy study. [114] | Stoll        | Non-exclusion of comorbidities                                 |
| Choline, myo-inositol and mood in bipolar disorder: a proton magnetic resonance spectroscopic imaging study of the anterior cingulate cortex. [115]                                       | Moore        | Not different groups for each mood states or lack of precision |
| Neuronal pathology in the hippocampal area of patients with bipolar disorder: a study with proton magnetic resonance spectroscopic imaging. [116]                                         | Bertolino    | Not different groups for each mood states or lack of precision |
| Chronic treatment with lithium, but not sodium valproate, increases cortical N-acetyl-aspartate concentrations in euthymic bipolar patients. [117]                                        | Silverstone  | Non-exclusion of comorbidities                                 |
| Lithium and valproate protect against dextro-amphetamine induced brain choline concentration changes in bipolar disorder patients. [118]                                                  | Silverstone  | Non-exclusion of comorbidities                                 |

|                                                                                                                                                                                                                |                 |                                                                |
|----------------------------------------------------------------------------------------------------------------------------------------------------------------------------------------------------------------|-----------------|----------------------------------------------------------------|
| Hippocampal neurochemical pathology in patients at first episode of affective psychosis: a proton magnetic resonance spectroscopic imaging study. [119]                                                        | Blasi           | Pediatric population included                                  |
| Magnetic resonance spectroscopic measurement of cerebral gamma-aminobutyric acid concentrations in patients with bipolar disorders. [120]                                                                      | Wang            | Not different groups for each mood states or lack of precision |
| Dopamine transporter genotype influences N-acetyl-aspartate in the left putamen. [121]                                                                                                                         | Scherk          | Non-exclusion of comorbidities                                 |
| Reduction in occipital cortex gamma-aminobutyric acid concentrations in medication-free recovered unipolar depressed and bipolar subjects. [122]                                                               | Bhagwagar       | Not in the regions of interest                                 |
| Brain gamma-aminobutyric acid (GABA) abnormalities in bipolar disorder. [123]                                                                                                                                  | Brady           | Not about Glu, Glx, Gln, NAA (on GABA)                         |
| Cortical glutathione levels in young people with bipolar disorder: a pilot study using magnetic resonance spectroscopy. [124]                                                                                  | Godlewska       | Non-exclusion of comorbidities                                 |
| Cluster analysis reveals abnormal hippocampal neurometabolic profiles in young people with mood disorders. [125]                                                                                               | Hermens         | Not different groups for each mood states                      |
| Individual prediction of symptomatic converters in youth offspring of bipolar parents using proton magnetic resonance spectroscopy. [126]                                                                      | Zhang           | Pediatric population included                                  |
| Functional magnetic resonance spectroscopy in patients with schizophrenia and bipolar affective disorder: Glutamate dynamics in the anterior cingulate cortex during a working memory task. [127]              | Jelen           | Not different groups for each mood states or lack of precision |
| Hippocampal 1H MRS in patients with bipolar disorder taking valproate versus valproate plus quetiapine. [128]                                                                                                  | Atmaca          | Not different groups for each mood states or lack of precision |
| SNAP-25 genotype influences NAA/Cho in left hippocampus. [129]                                                                                                                                                 | Scherk          | Non-exclusion of comorbidities                                 |
| Association of the brain-derived neurotrophic factor val66met polymorphism with magnetic resonance spectroscopic markers in the human hippocampus: in vivo evidence for effects on the glutamate system. [130] | Gruber          | Non-exclusion of comorbidities                                 |
| Neurochemical alteration in the caudate: implications for the pathophysiology of bipolar disorder. [131]                                                                                                       | Shahana         | Pediatric population included                                  |
| Increased thalamic phospholipid concentration evident in bipolar I disorder. [132]                                                                                                                             | Howells         | Non-exclusion of comorbidities                                 |
| Magnetic resonance spectroscopy imaging of lactate in patients with bipolar disorder. [133]                                                                                                                    | Chu             | Not different groups for each mood states or lack of precision |
| Hippocampal glutamatergic/NMDA receptor functioning in bipolar disorder: A study combining mismatch negativity and proton magnetic resonance spectroscopy. [134]                                               | Chitty          | Not different groups for each mood states or lack of precision |
| Dorsal Anterior Cingulate Lactate and Glutathione Levels in Euthymic Bipolar I Disorder: 1H-MRS Study. [135]                                                                                                   | Soeiro-De-Souza | Not about Glu, Glx, Gln, NAA (on GSH and Lactate)              |
| ACC Glu/GABA ratio is decreased in euthymic bipolar disorder I patients: possible in vivo neurometabolite explanation for mood stabilization. [136]                                                            | Scotti-Muzzi    | Duplicate same data                                            |
| Neurochemical effects of quetiapine in patients with bipolar mania: a proton magnetic resonance spectroscopy study. [137]                                                                                      | Adler           | Missing data                                                   |
| (1)H-MRS of hippocampus in patients after first manic episode. [138]                                                                                                                                           | Gigante         | Pediatric population included                                  |
| Bcl-2 rs956572 polymorphism is associated with increased anterior cingulate cortical glutamate in euthymic bipolar I disorder. [139]                                                                           | Soeiro-De-Souza | Duplicate same data                                            |

|                                                                                                                                                                                           |                |                                                                          |
|-------------------------------------------------------------------------------------------------------------------------------------------------------------------------------------------|----------------|--------------------------------------------------------------------------|
| Investigation of Heschl's gyrus and planum temporale in patients with schizophrenia and bipolar disorder: a proton magnetic resonance spectroscopy study. [140]                           | Atagun         | Not in the regions of interest                                           |
| Neurochemical differences between bipolar disorder type I and II in superior temporal cortices: A proton magnetic resonance spectroscopy study. [141]                                     | Atagun         | Not in the regions of interest                                           |
| Increased thalamic N-acetylaspartate in male patients with familial bipolar I disorder. [142]                                                                                             | Deicken        | Not in the regions of interest                                           |
| Genetic variant in SLC1A2 is associated with elevated anterior cingulate cortex glutamate and lifetime history of rapid cycling. [143]                                                    | Veldic         | Not control data                                                         |
| Large positive effect of lithium on prefrontal cortex N-acetylaspartate in patients with bipolar disorder: 2-centre study. [144]                                                          | Hajek          | Missing data                                                             |
| Increased anterior cingulate/medial prefrontal cortical glutamate and creatine in bipolar depression. [145]                                                                               | Frye           | Not in the regions of interest (PFC and ACC in a unique ROI)             |
| Neurochemical abnormalities in unmedicated bipolar depression and mania: a 2D 1H MRS investigation. [146]                                                                                 | Xu             | Missing data                                                             |
| Biochemical changes in the cingulum in patients with schizophrenia and chronic bipolar disorder. [147]                                                                                    | Sarramea       | Not in the regions of interest (ACC and PFC in a unique ROI)             |
| A Longitudinal (6-week) 3T (1)H-MRS Study on the Effects of Lithium Treatment on Anterior Cingulate Cortex Metabolites in Bipolar Depression. [148]                                       | Machado-Vieira | Duplicate same data                                                      |
| Association of altered thyroid hormones and neurometabolism to cognitive dysfunction in unmedicated bipolar II depression [149]                                                           | Lai            | Pediatric population included                                            |
| Altered brain creatine cycle metabolites in bipolar I disorder with childhood abuse: A 1 H magnetic resonance spectroscopy study [50]                                                     | Soares Bio     | Duplicate same data                                                      |
| Choline-containing compounds detected by proton magnetic resonance spectroscopy in the basal ganglia in bipolar disorder. [151]                                                           | Kato           | Not in the regions of interest                                           |
| Quantitative proton magnetic resonance spectroscopy of the basal ganglia in patients with affective disorders [152]                                                                       | Hamakawa       | Not in the regions of interest                                           |
| Proton magnetic resonance spectroscopy of the lenticular nuclei in bipolar I affective disorder. [153]                                                                                    | Ohara          | Not in the regions of interest                                           |
| Biochemical abnormalities in basal ganglia and executive dysfunction in acute- and euthymic-episode patients with bipolar disorder: A proton magnetic resonance spectroscopy study. [154] | Lai            | Not in the regions of interest                                           |
| The characteristic of cognitive impairments in patients with bipolar II depression and its association with N-acetyl aspartate of the prefrontal white matter [155]                       | Zhong          | Missing data                                                             |
| Proinflammatory Cytokines Predict Brain Metabolite Concentrations in the Anterior Cingulate Cortex of Patients With Bipolar Disorder [156]                                                | Poletti        | Not different groups for each mood states or lack of precision           |
| Quantitative proton magnetic resonance spectroscopy of the bilateral frontal lobes in patients with bipolar disorder. [157]                                                               | Hamakawa       | Not in the regions of interest (lack of precision of the ROI in the PFC) |
| Weight gain as a risk factor for progressive neurochemical abnormalities in first episode mania patients: a longitudinal magnetic resonance spectroscopy study. [158]                     | Bond           | Pediatric population included                                            |

|                                                                                                                                                                                                       |               |                                                                |
|-------------------------------------------------------------------------------------------------------------------------------------------------------------------------------------------------------|---------------|----------------------------------------------------------------|
| Increased Glutamate Plus Glutamine in the Right Middle Cingulate in Early Schizophrenia but Not in Bipolar Psychosis: A Whole Brain 1H-MRS Study. [159]                                               | Bustillo      | Pediatric population included                                  |
| Evidence of altered metabolism of cellular membranes in bipolar disorder comorbid with post-traumatic stress disorder. [160]                                                                          | Jabbari-Zadeh | Not different groups for each mood states or lack of precision |
| Salience network glutamate and brain connectivity in medication-naïve first episode patients – A multimodal magnetic resonance spectroscopy and resting state functional connectivity MRI study [161] | Maximo        | <u>Pediatrics</u> population included                          |
| Mapping Disease Course Across the Mood Disorder Spectrum Through a Research Domain Criteria Framework [162]                                                                                           | Whitton       | Not exclusion of comorbidities                                 |

### **Hippocampus:**

Supplementary Figure S1: Studies SMDs of glutamate differences between euthymic BD patients and controls in the left hippocampus:

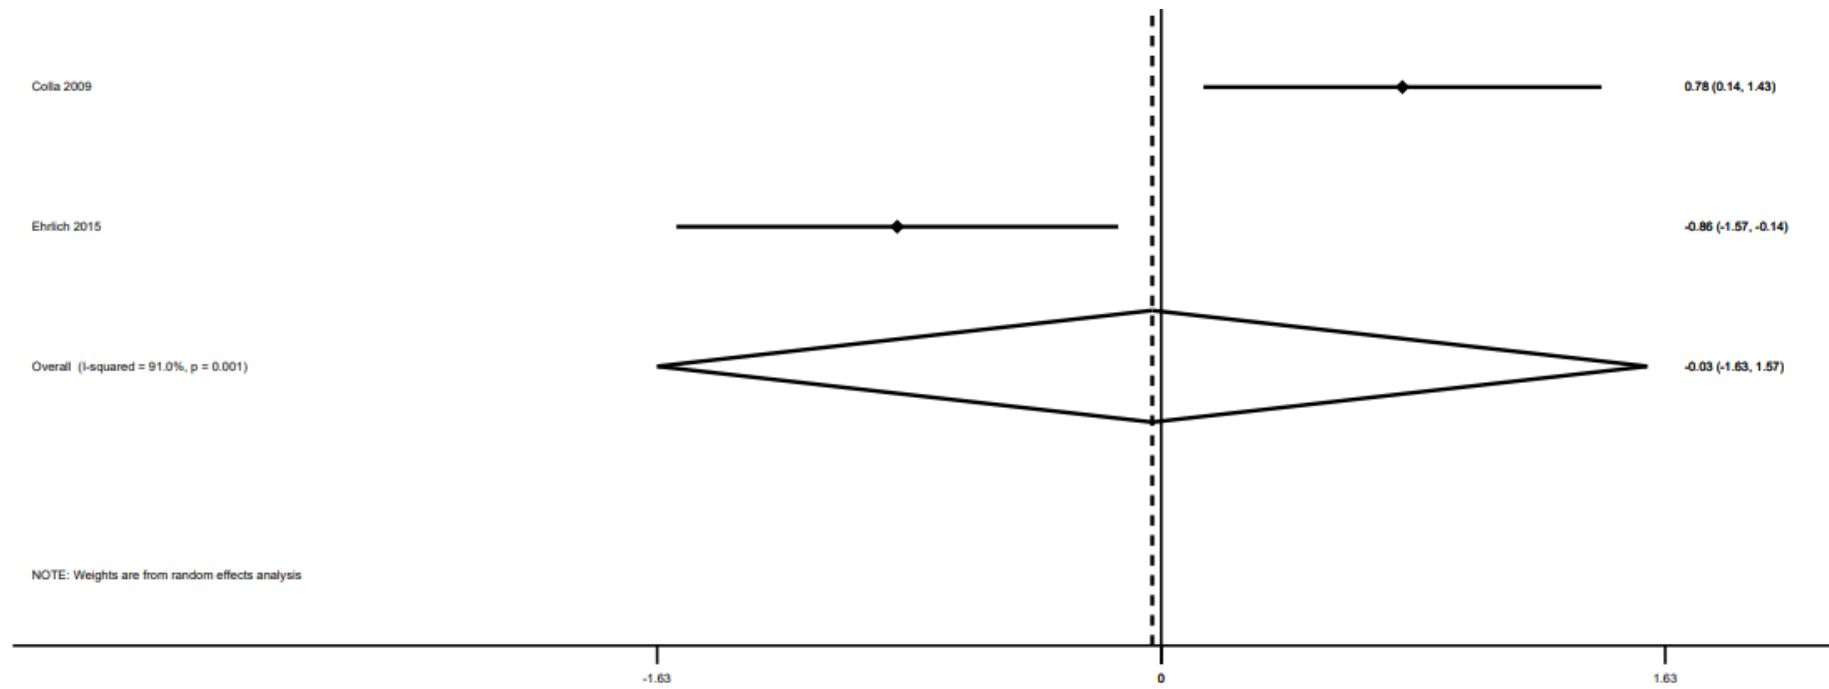

Supplementary Figure S2A: Studies SMDs of N-acetylaspartate differences between euthymic BD patients and controls in the left hippocampus:



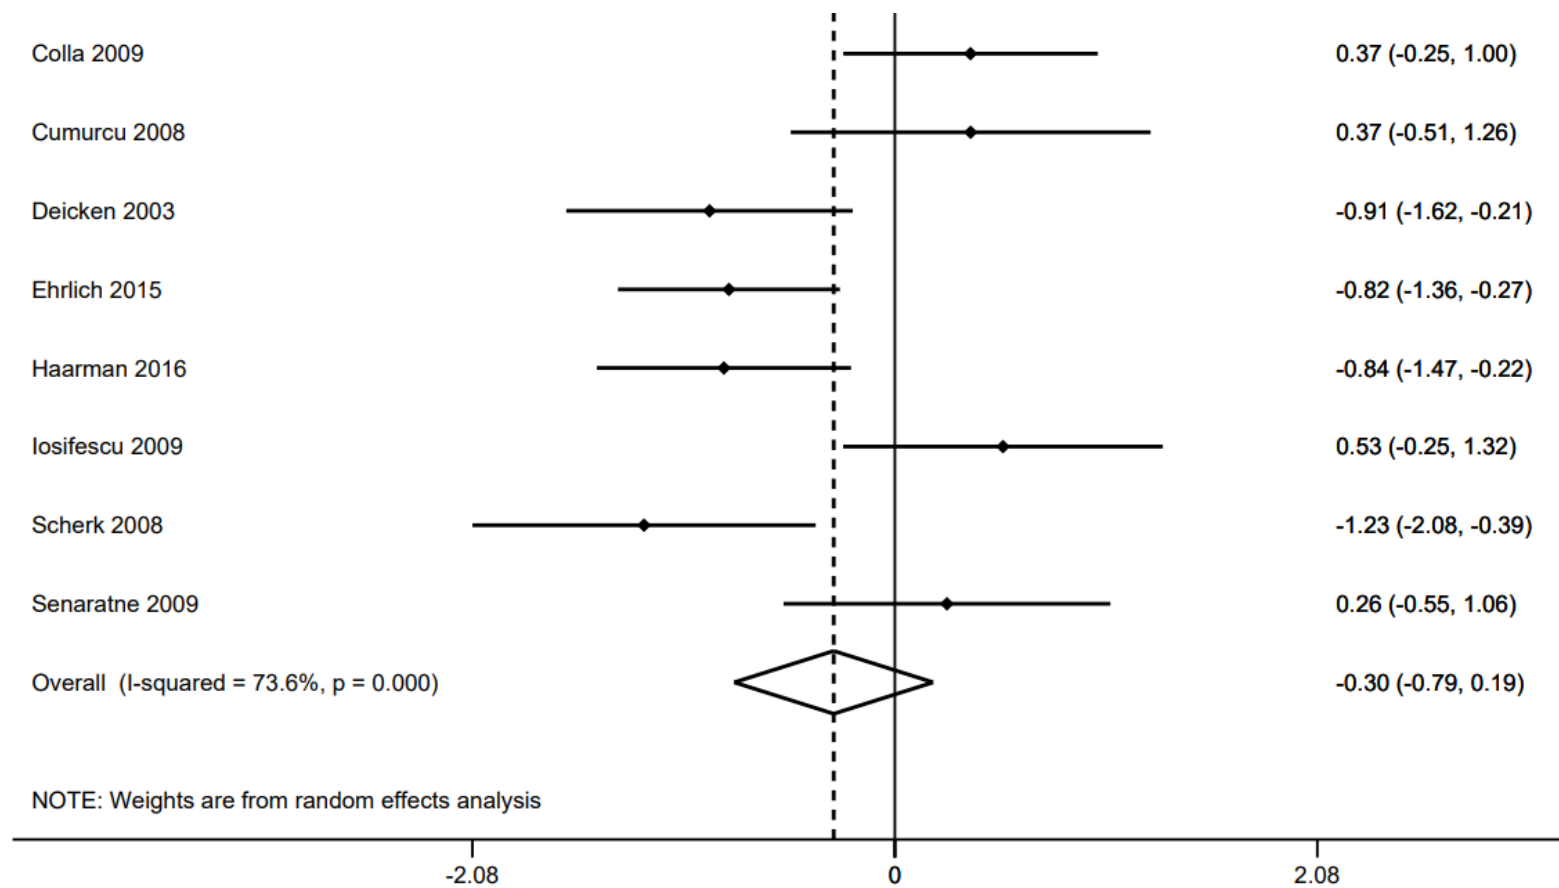

Supplementary Figure S2B: Studies SMDs of N-acetylaspartate differences between euthymic BD patients and controls in the left hippocampus according to quantification methodology:

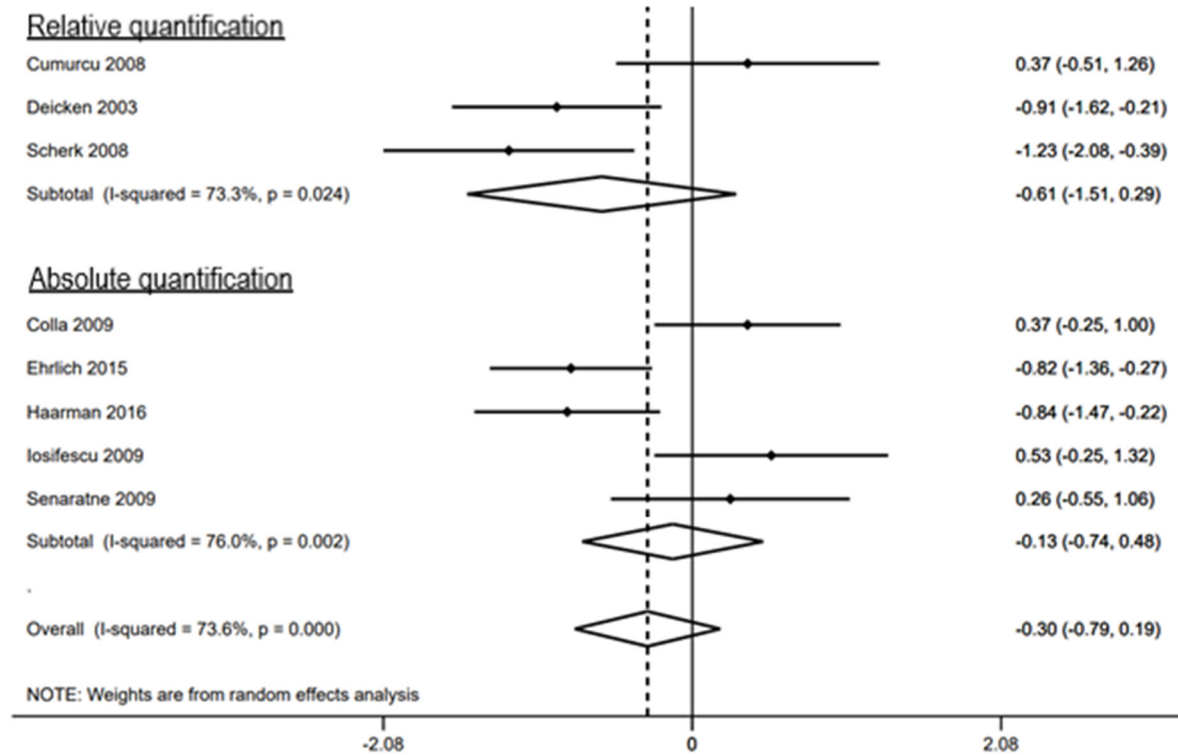

Supplementary Figure S3: Studies SMDs of N-acetylaspartate differences between depressed BD patients and controls in the left hippocampus:

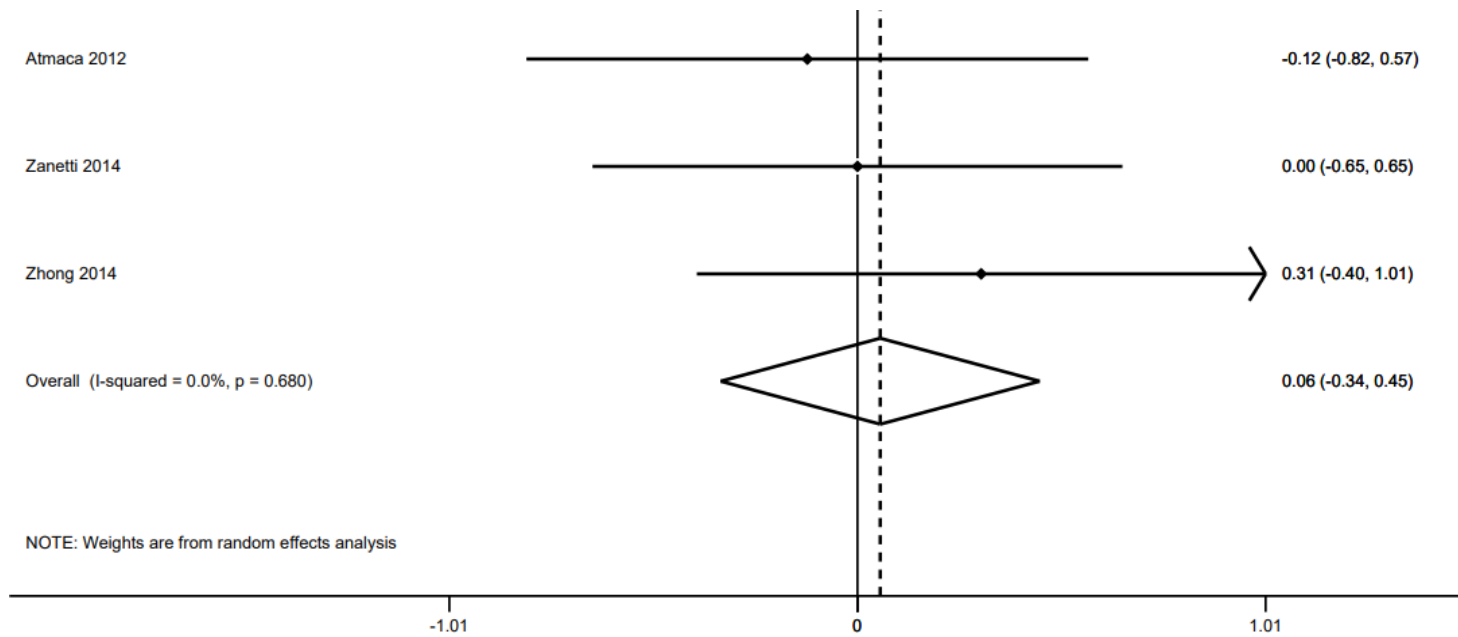

Supplementary Figure S4: Studies SMDs of N-acetylaspartate differences between depressed BD patients and controls in the right hippocampus:

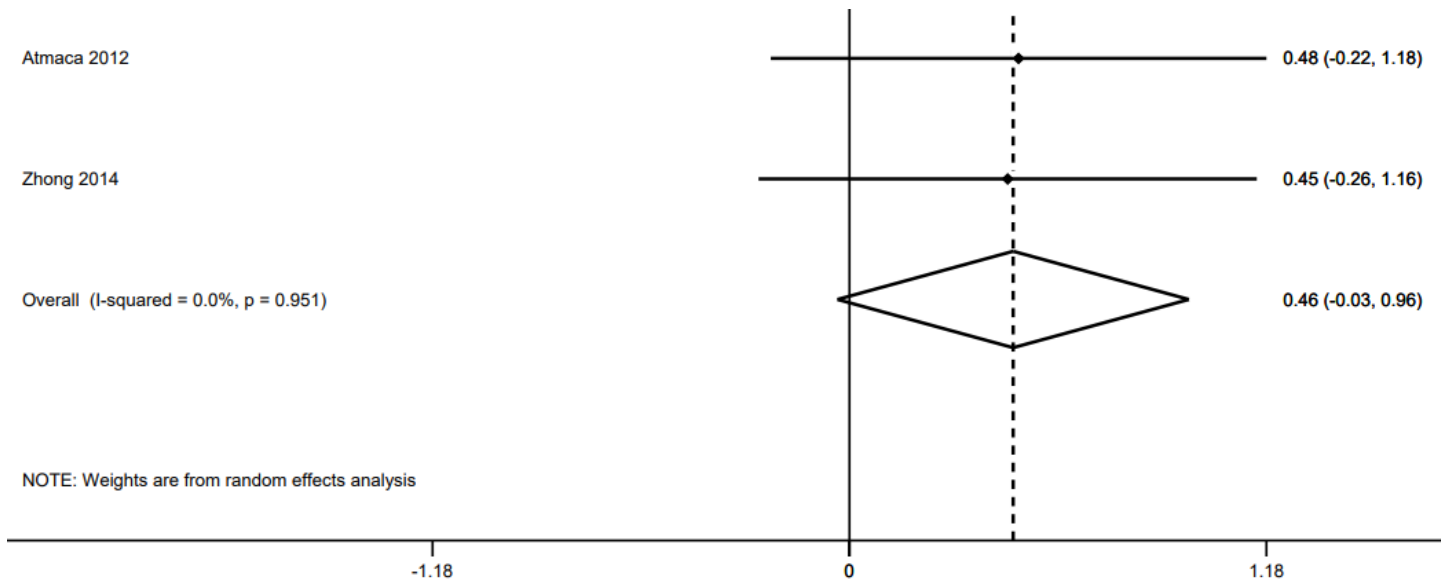

Supplementary Figure S5A: Studies SMDs of N-acetylaspartate differences between euthymic BD patients and controls in the right hippocampus:

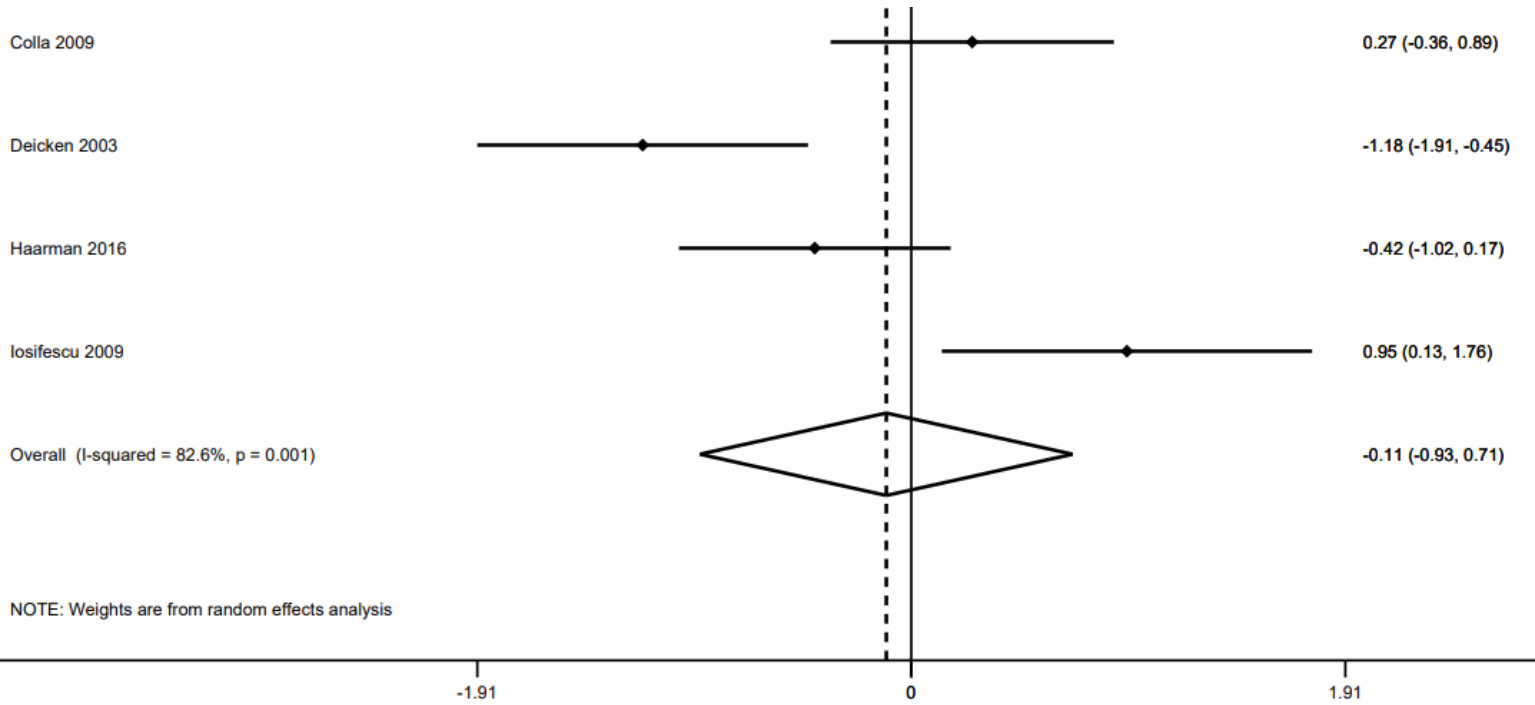

Supplementary Figure S5B: Studies SMDs of N-acetylaspartate differences between euthymic BD patients and controls in the right hippocampus according to quantification methodology:

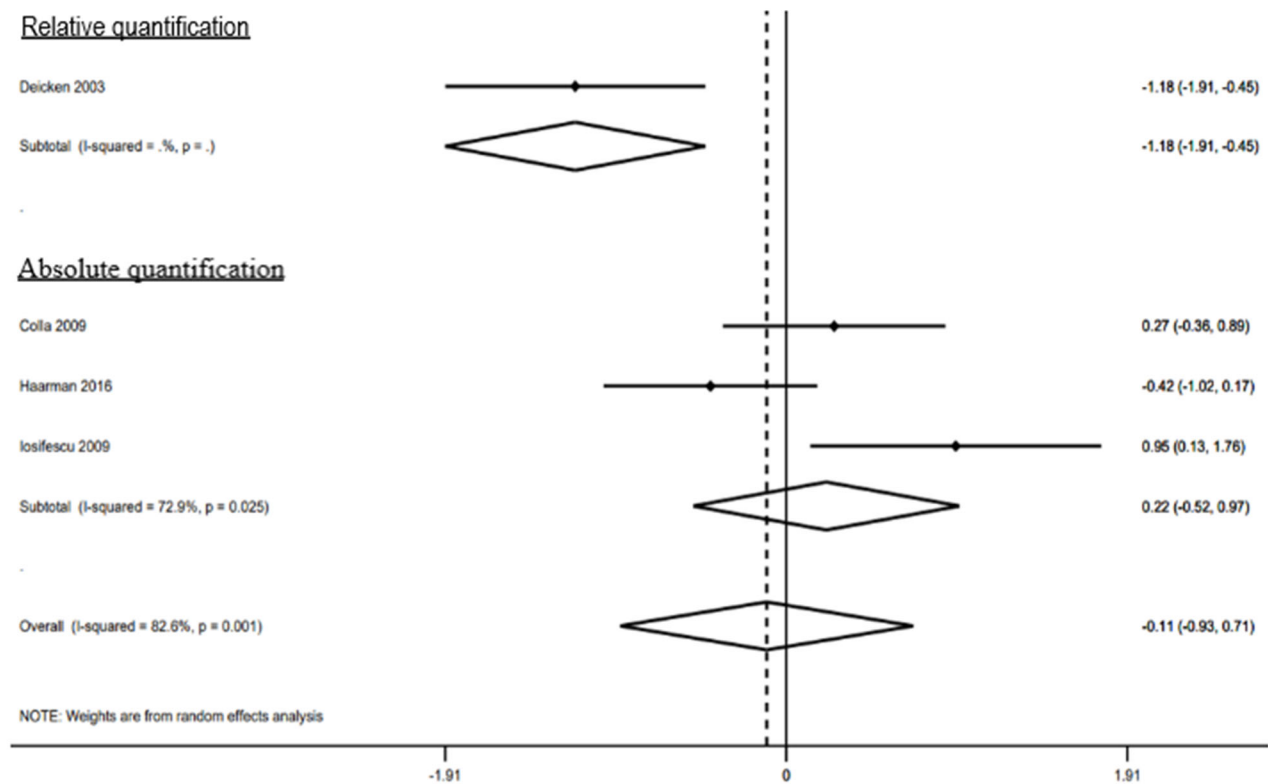

## ACC:

Supplementary Figure S6A: Studies SMDs of glutamine differences between euthymic BD patients and controls in the ACC:

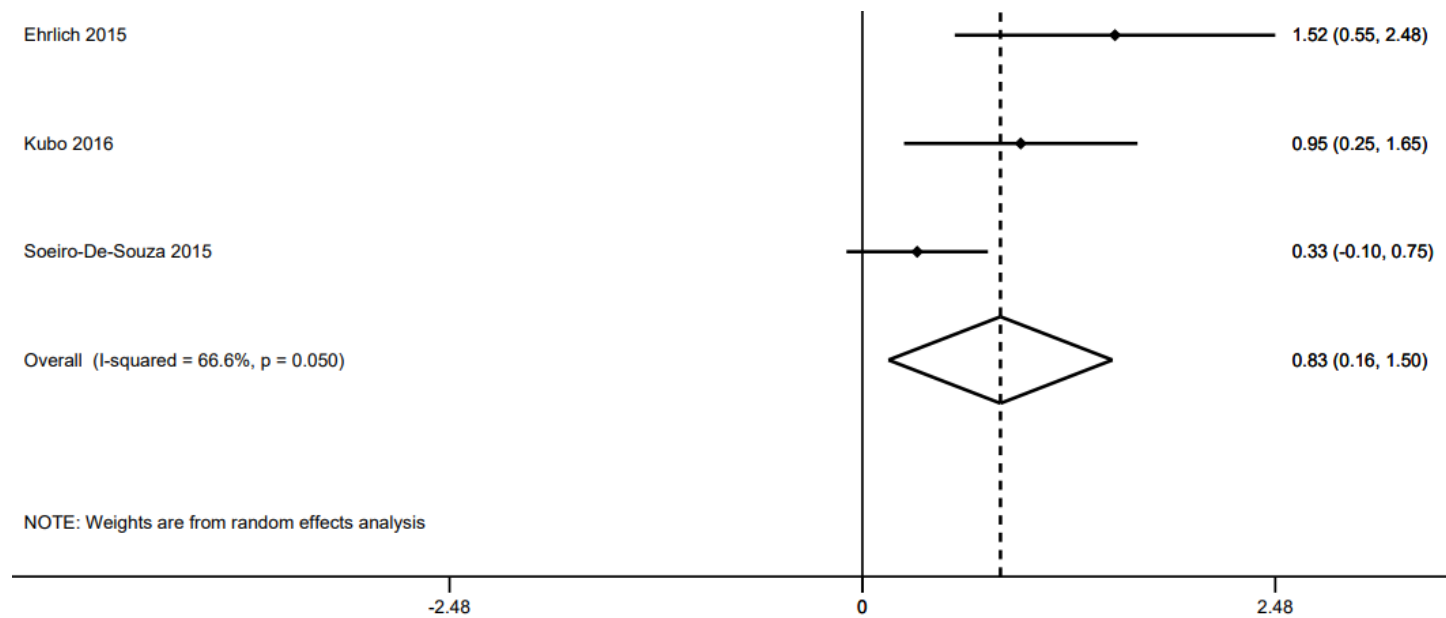

Supplementary Figure S6B: Studies SMDs of glutamine differences between euthymic BD patients and controls in the ACC according to quantification methodology:

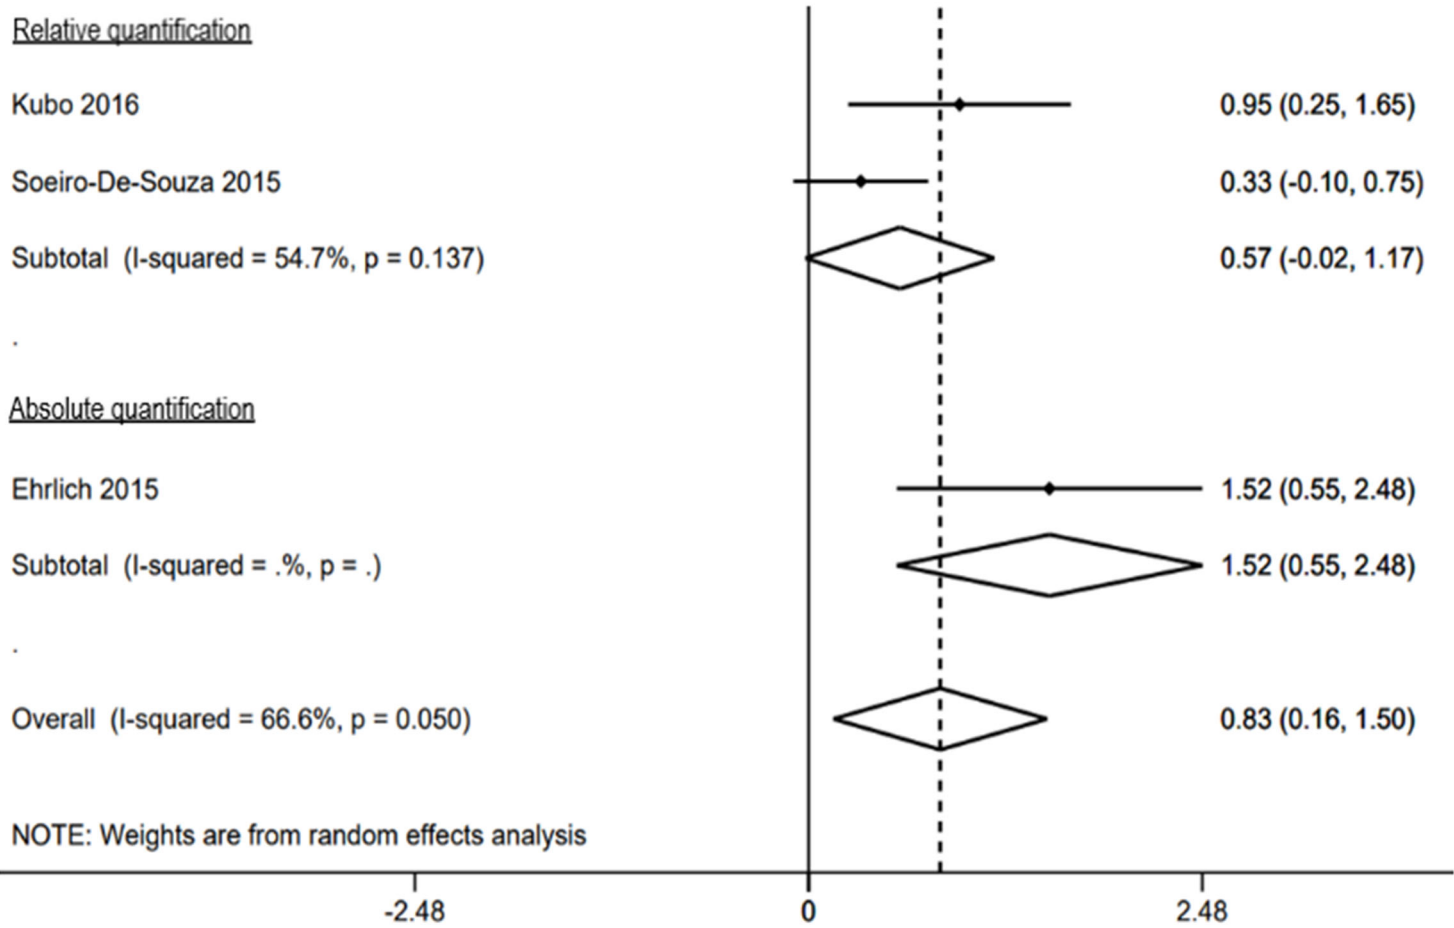



Supplementary Figure S7: Studies SMDs of glutamate differences between depressed BD patients and controls in the ACC:

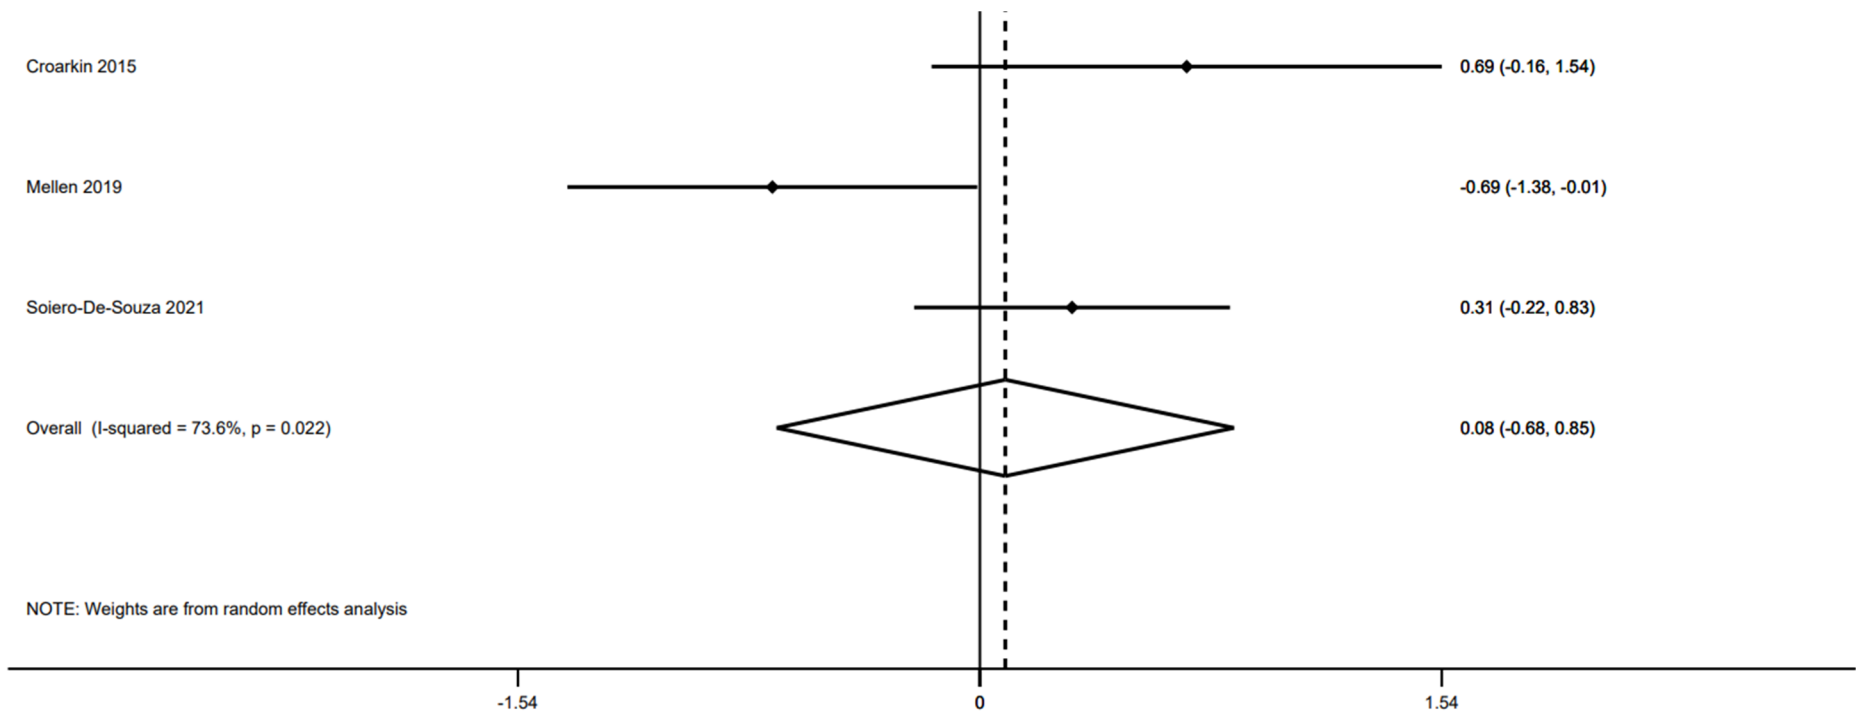

Supplementary Figure S8A: Studies SMDs of glutamate differences between euthymic BD patients and controls in the ACC:

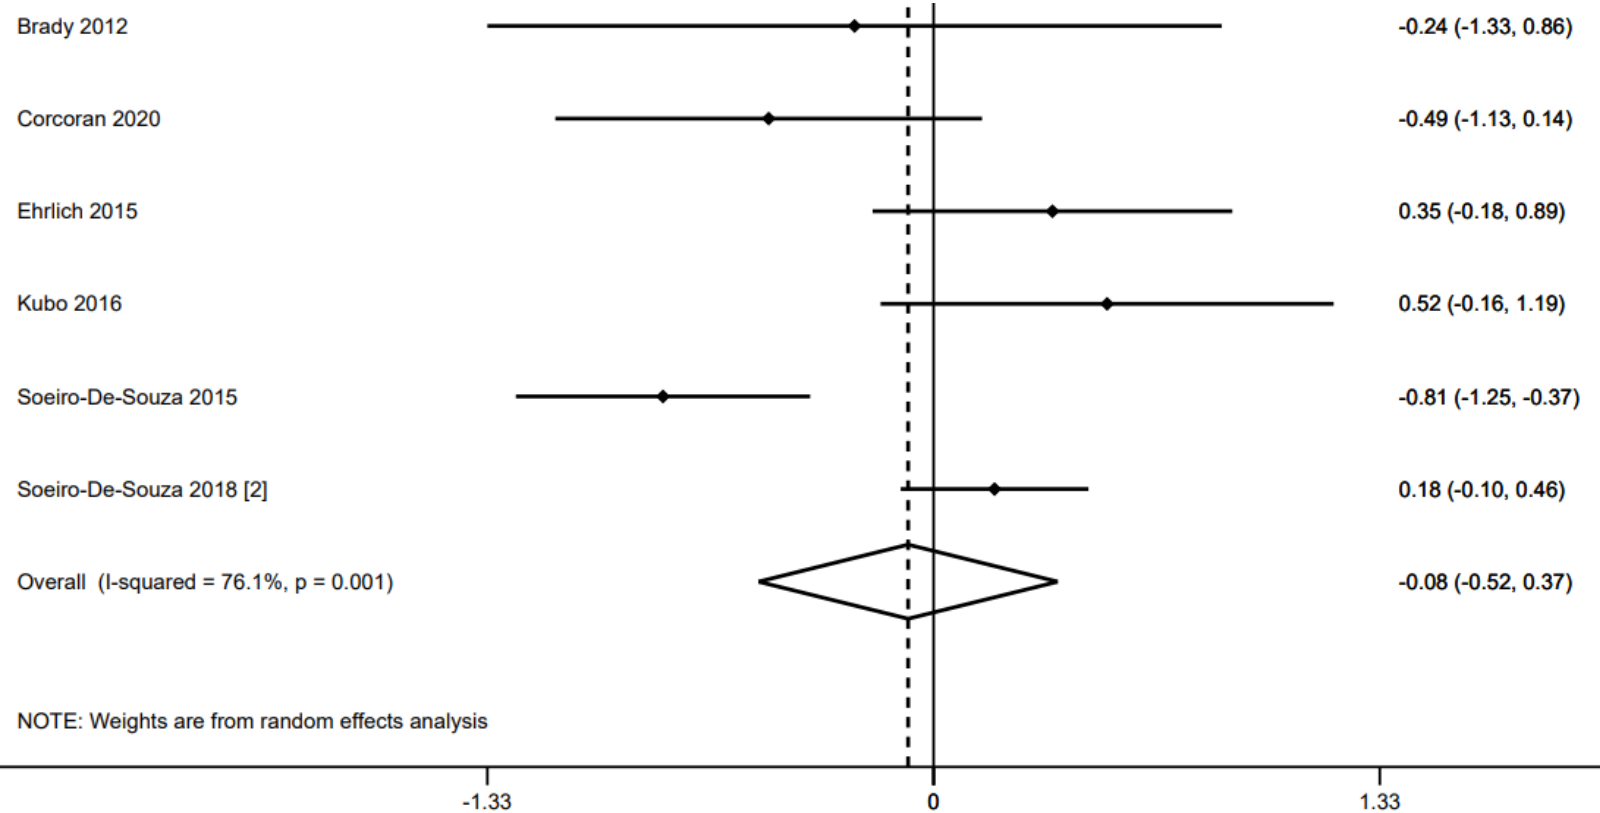

Supplementary Figure S8B: Studies SMDs of glutamate differences between euthymic BD patients and controls in the ACC according to quantification methodology:

Relative quantification

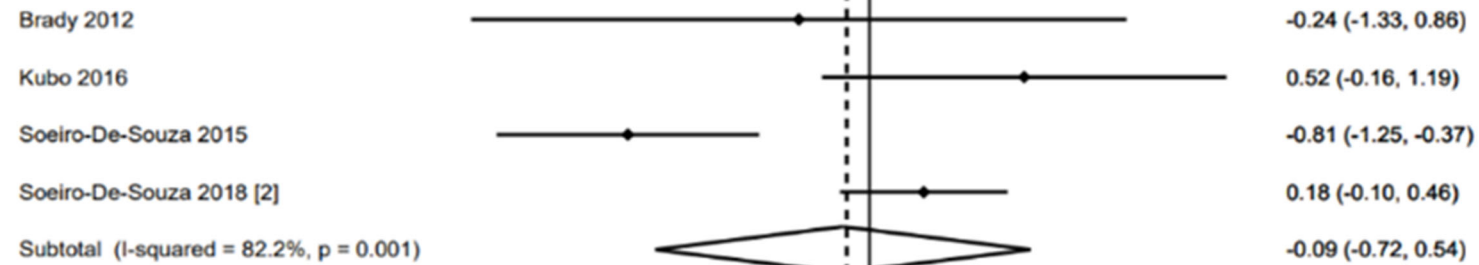

Absolute quantification

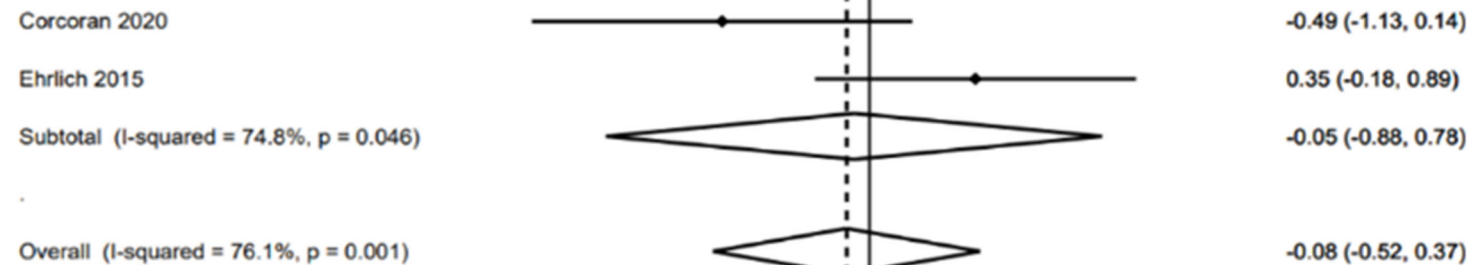

NOTE: Weights are from random effects analysis

Supplementary Figure S8C: Studies SMDs of glutamate differences between euthymic BD patients and controls in the pregenual ACC and dorsal ACC:

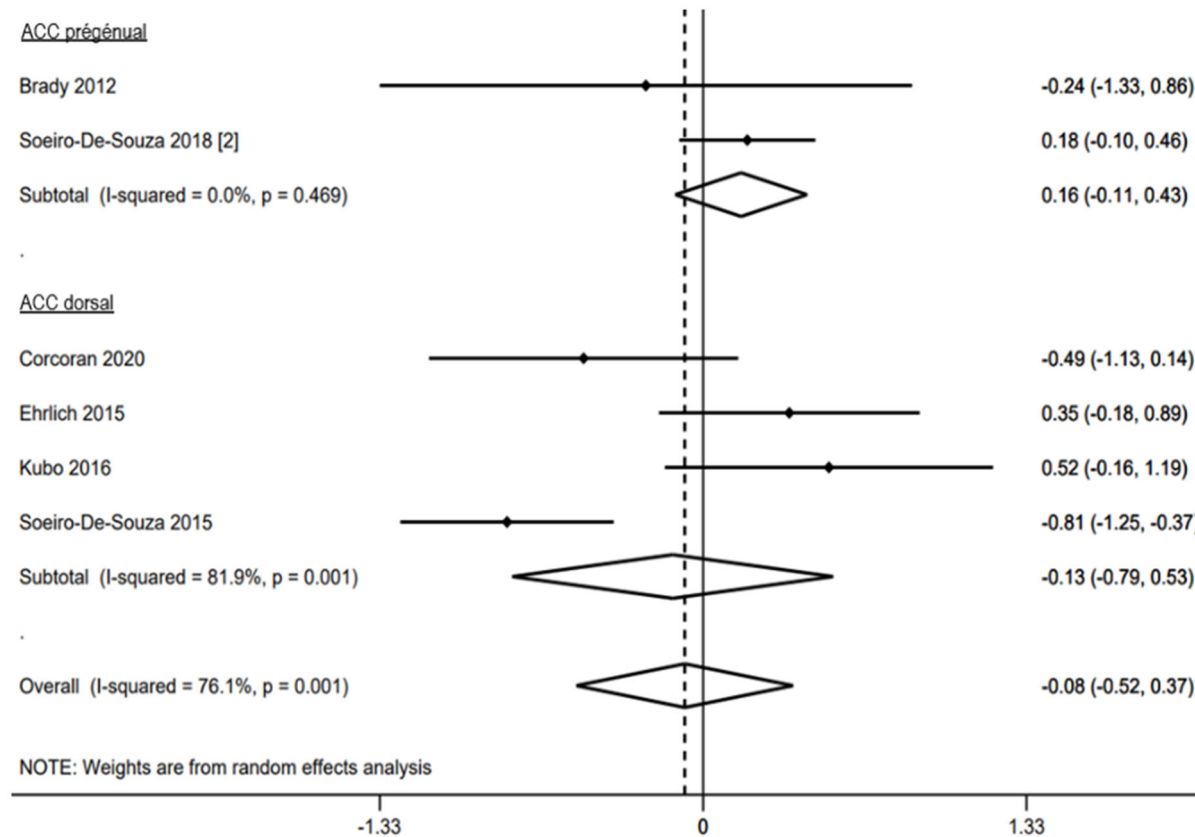

Supplementary Figure S9A: Studies SMDs of Glx differences between depressed BD patients and controls in the ACC:

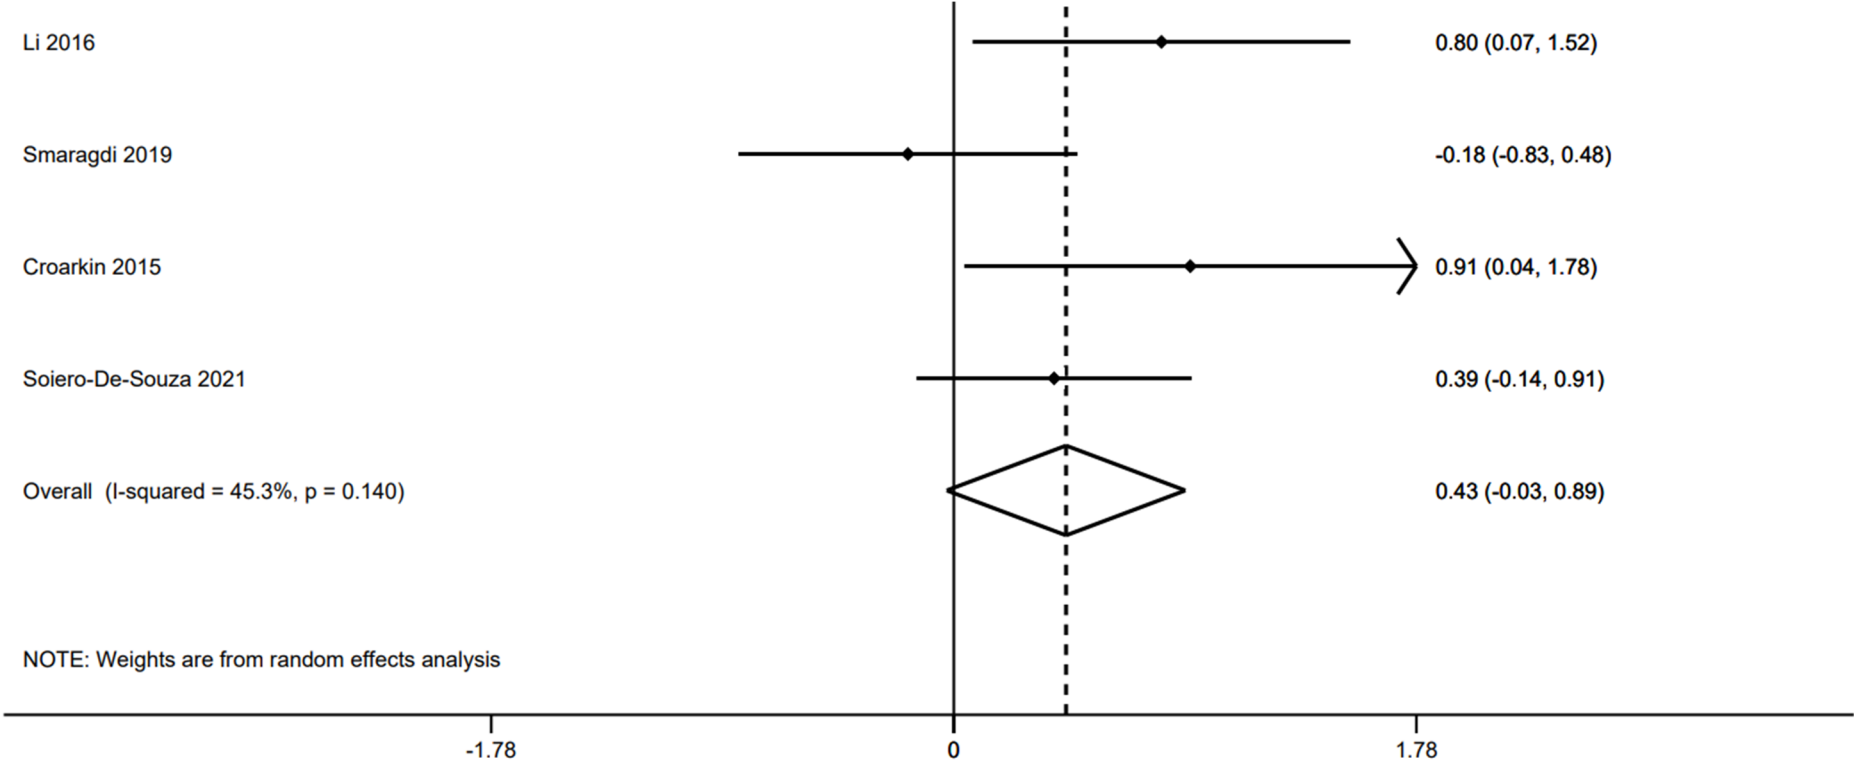

Supplementary Figure S9B: Studies SMDs of Glx differences between depressed BD patients and controls in the ACC according to quantification methodology:

**Absolute quantification**

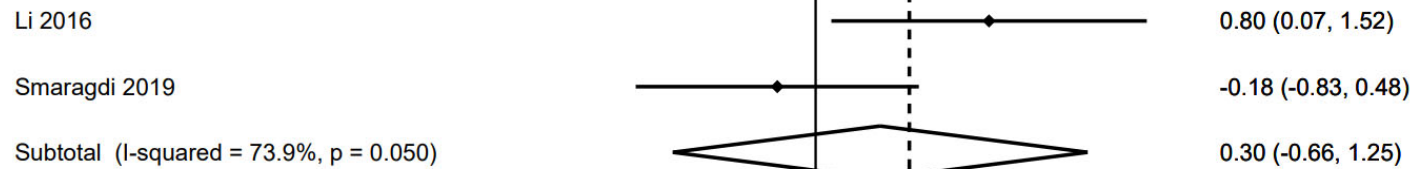

**Relative quantification**

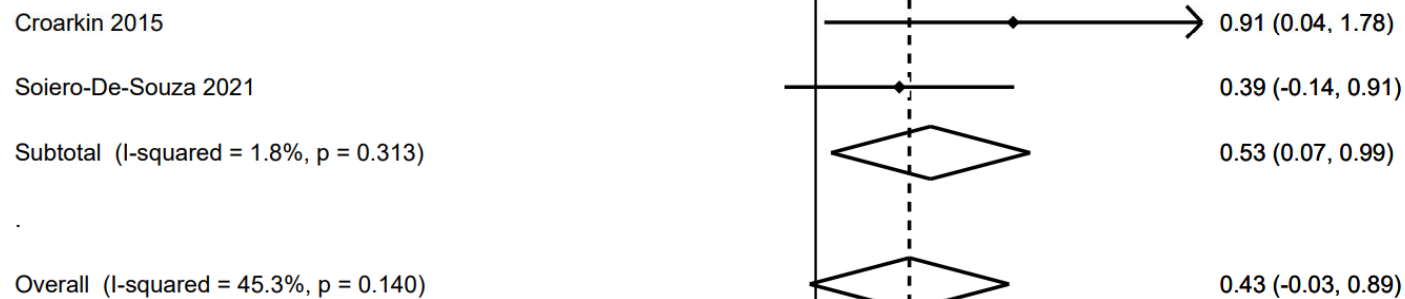

NOTE: Weights are from random effects analysis

Supplementary Figure S10A: Studies SMDs of N-acetylaspartate differences between depressed BD patients and controls in the ACC:

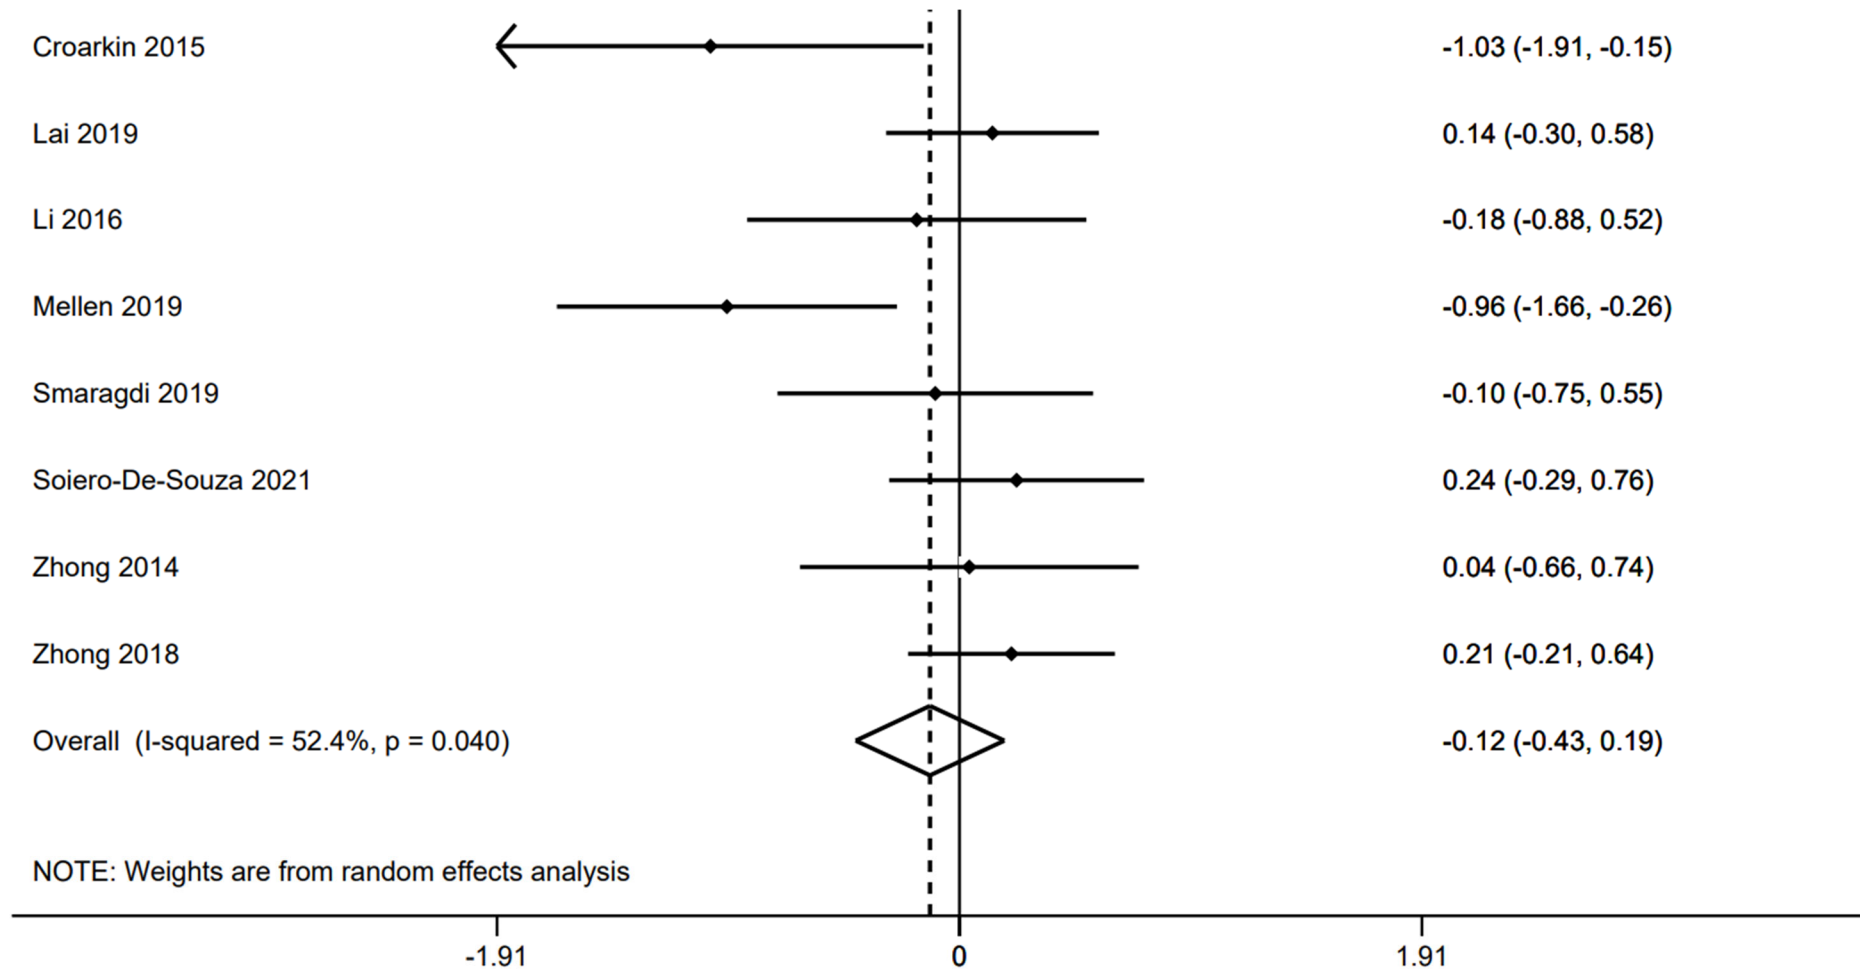

Supplementary Figure S10B: Studies SMDs of N-acetylaspartate differences between depressed BD patients and controls in the ACC according to quantification methodology:

**Relative quantification:**

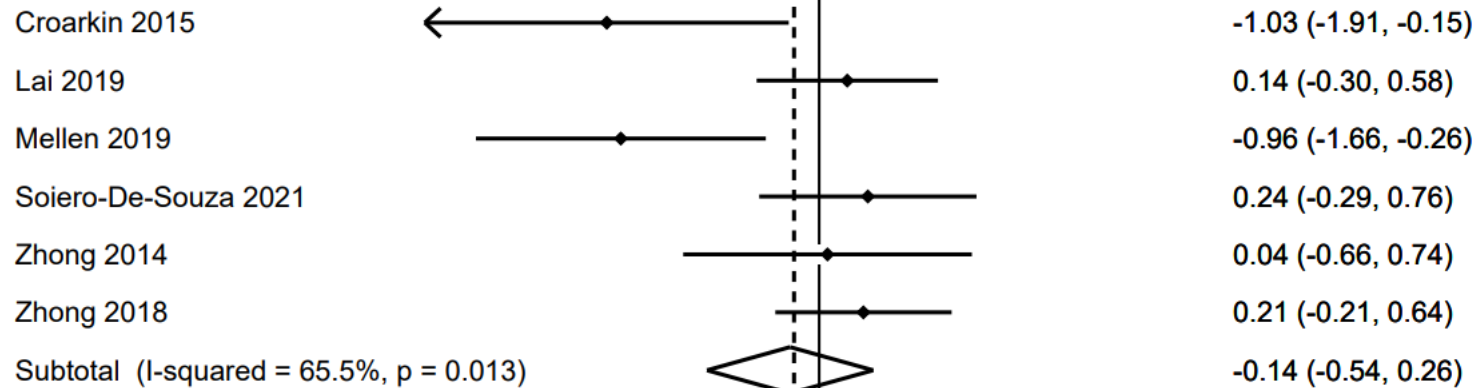

**Absolute quantification:**

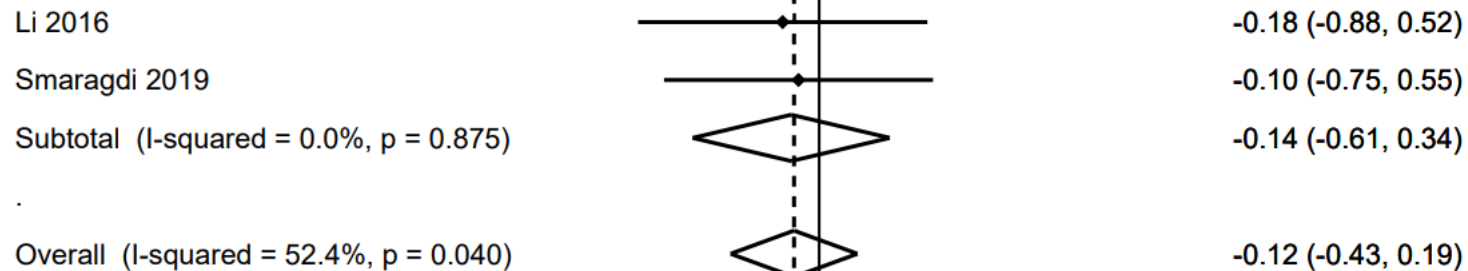

NOTE: Weights are from random effects analysis

-1.91

0

1.91



Supplementary Figure S10C: Studies SMDs of N-acetylaspartate differences between depressed BD patients and controls in the dorsal ACC:

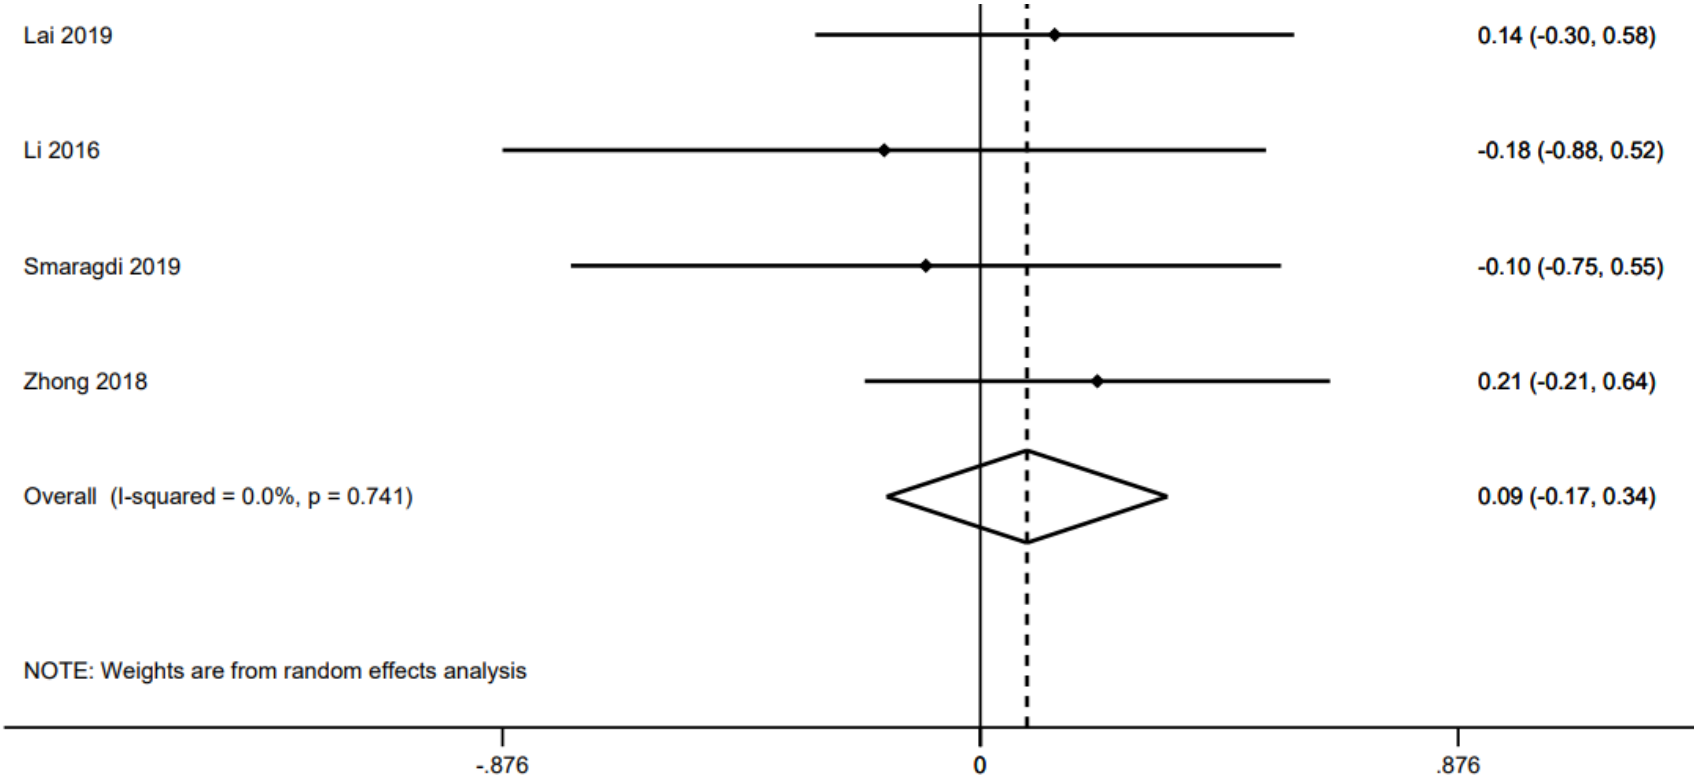

Supplementary Figure S10D: Studies SMDs of N-acetylaspartate differences between depressed BD patients and controls in the pregenual ACC:

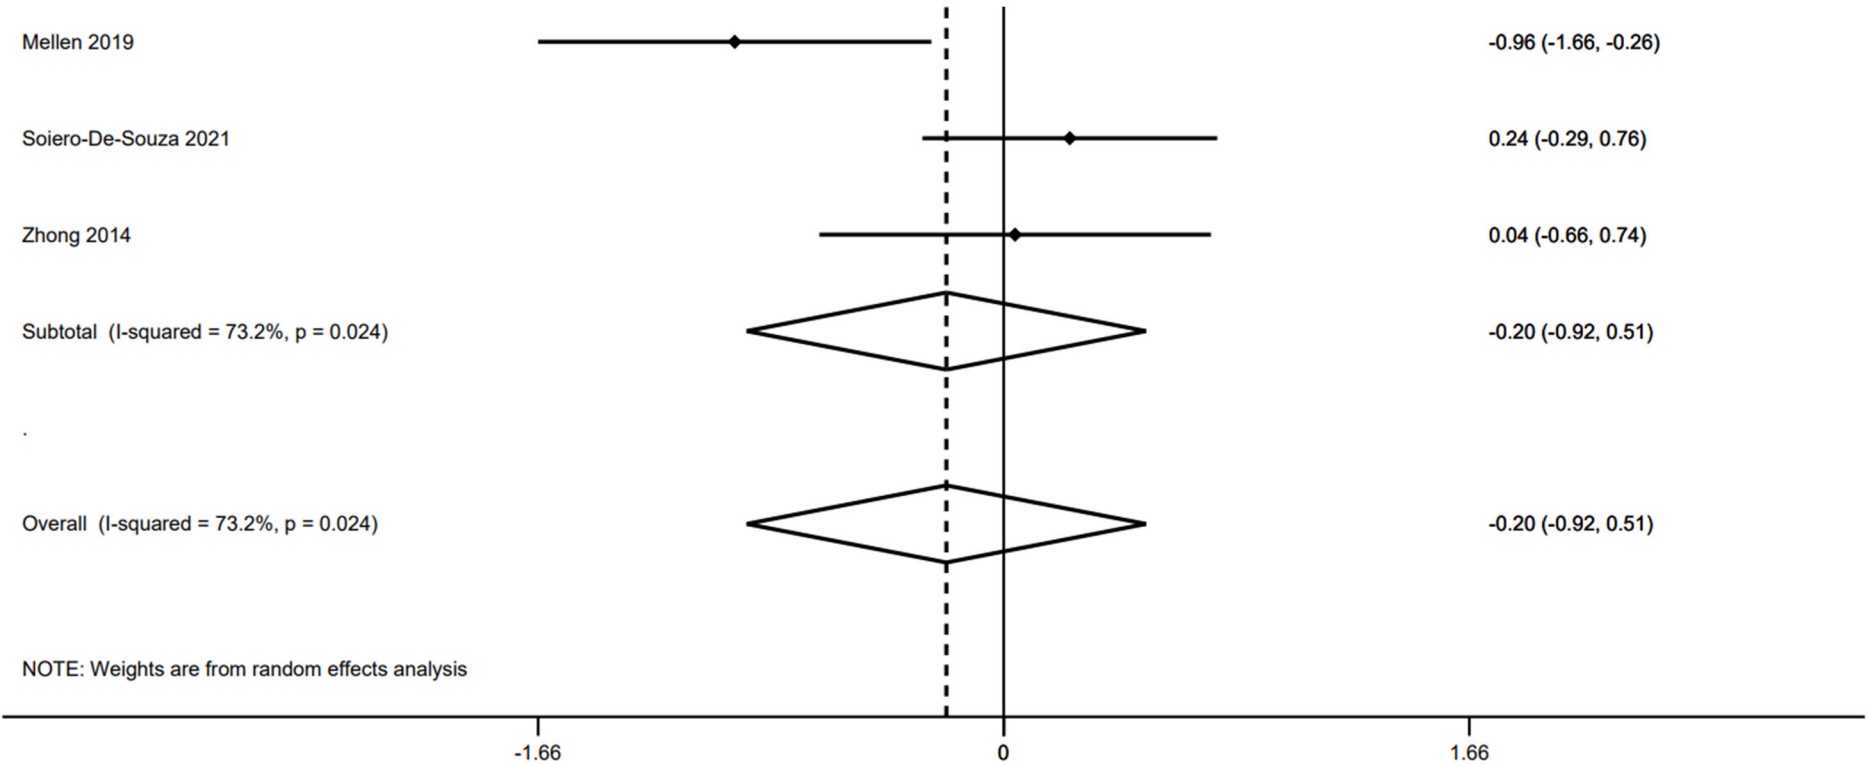

Supplementary Figure S11A: Studies SMDs of N-acetylaspartate differences between euthymic BD patients and controls in the ACC:

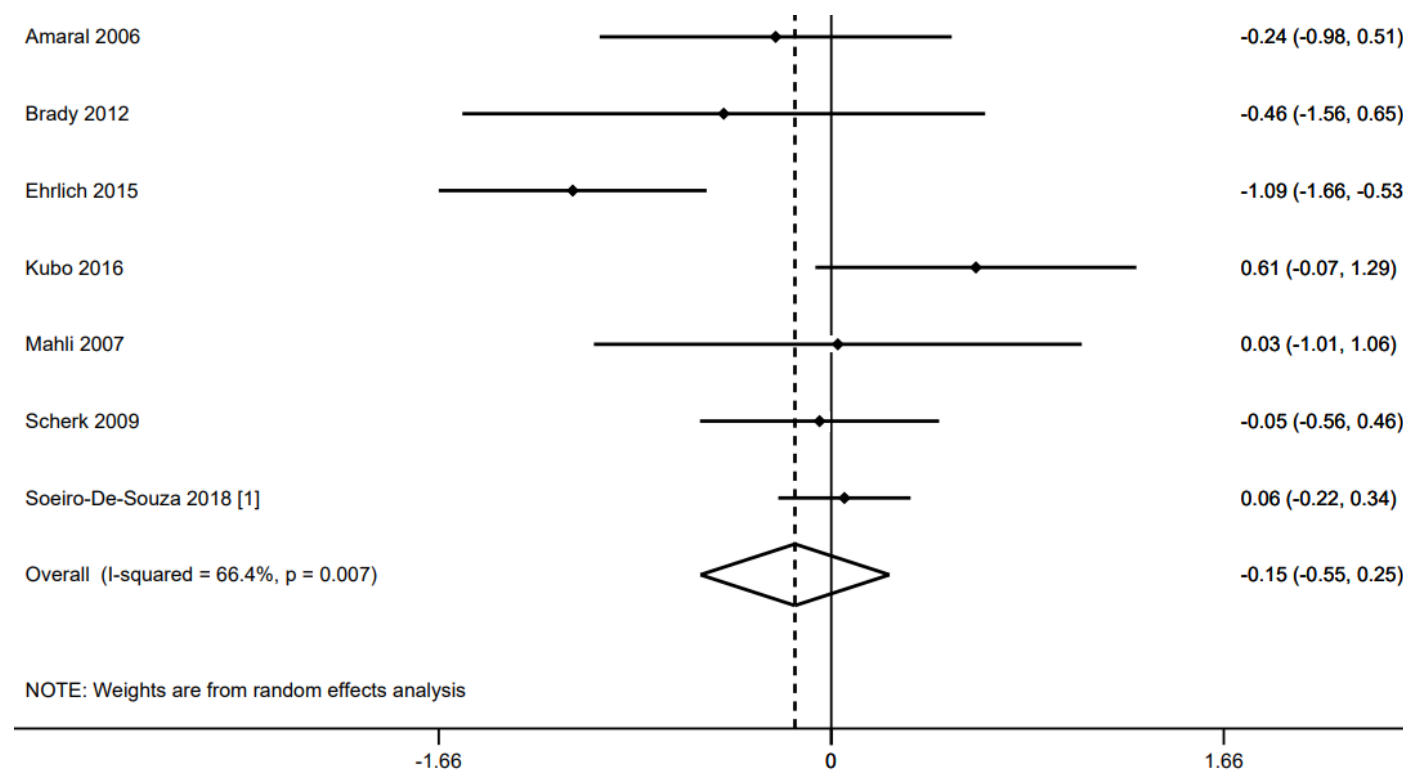

Supplementary Figure S11B: Studies SMDs of N-acetylaspartate differences between euthymic BD patients and controls in the ACC according to quantification methodology:

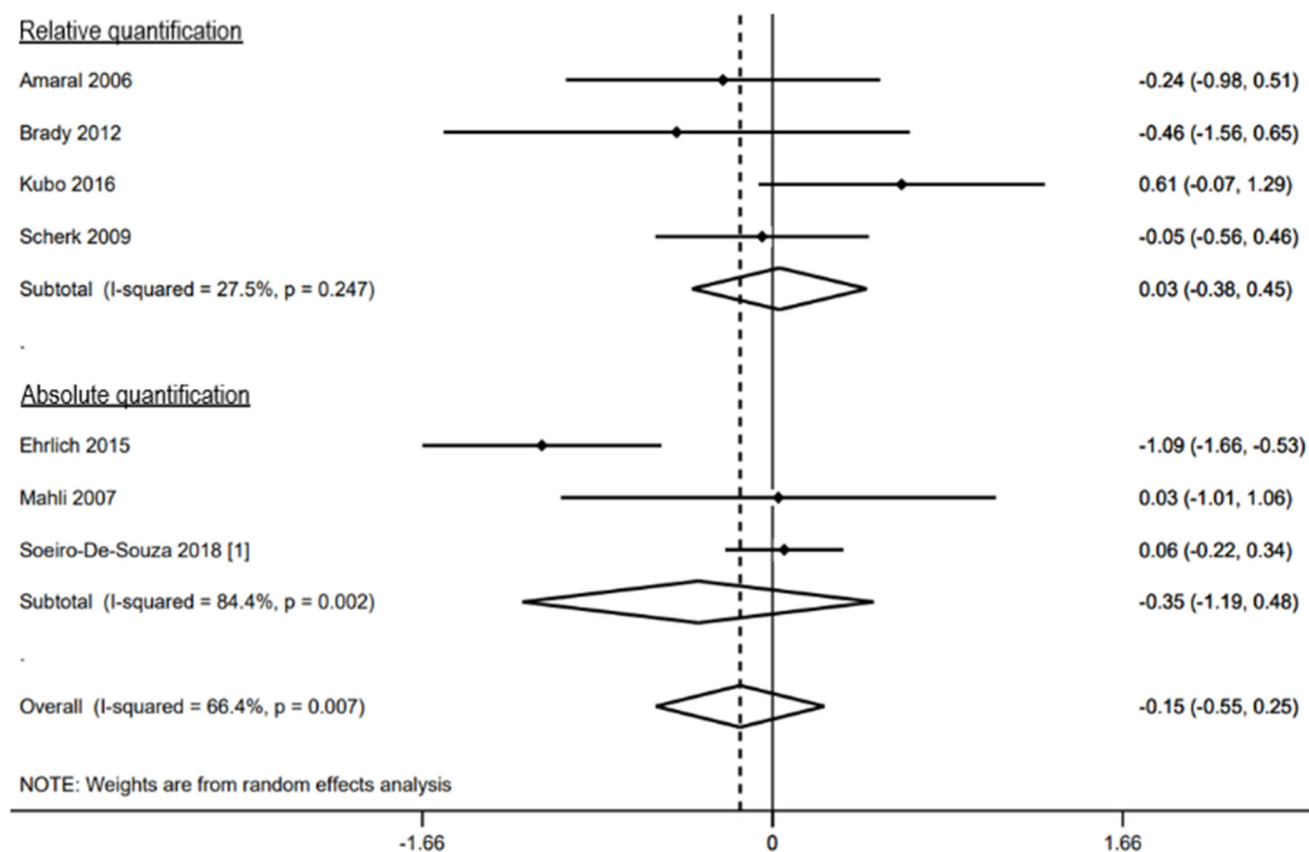

Supplementary Figure S11C: Studies SMDs of N-acetylaspartate differences between euthymic BD patients and controls in the dorsal ACC:

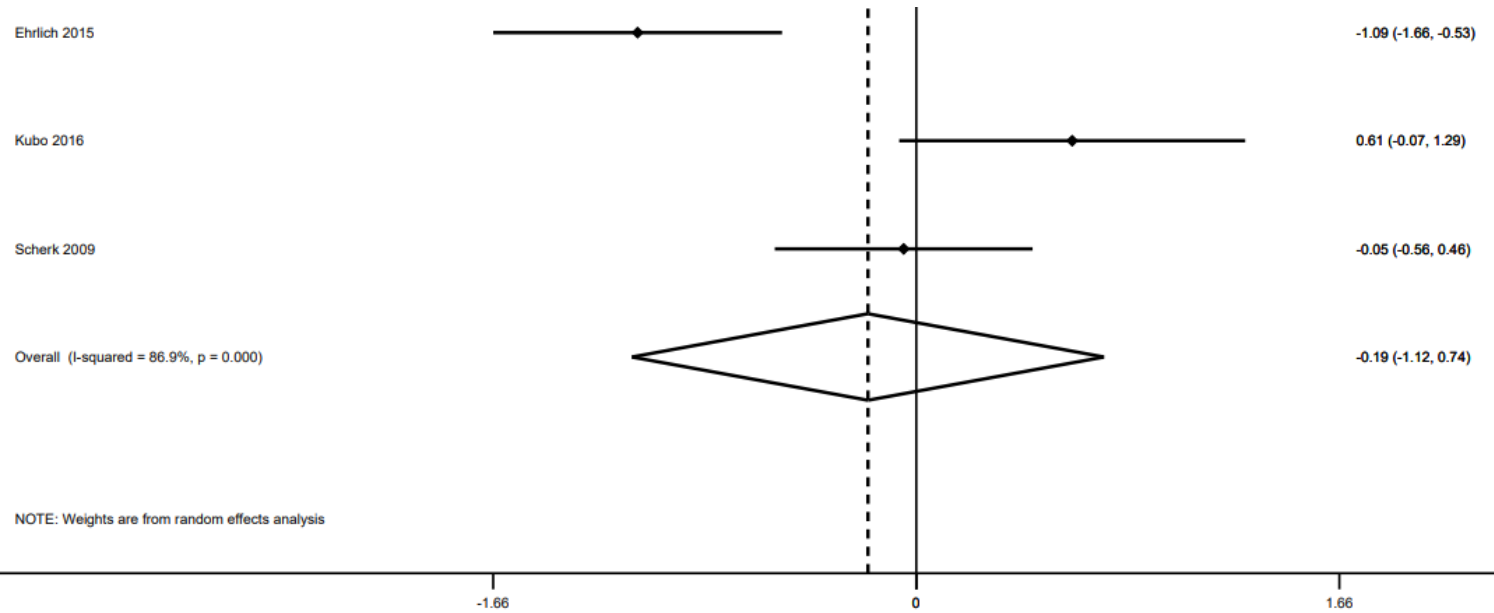

Supplementary Figure S11D: Studies SMDs of N-acetylaspartate differences between euthymic BD patients and controls in the pregenual ACC:

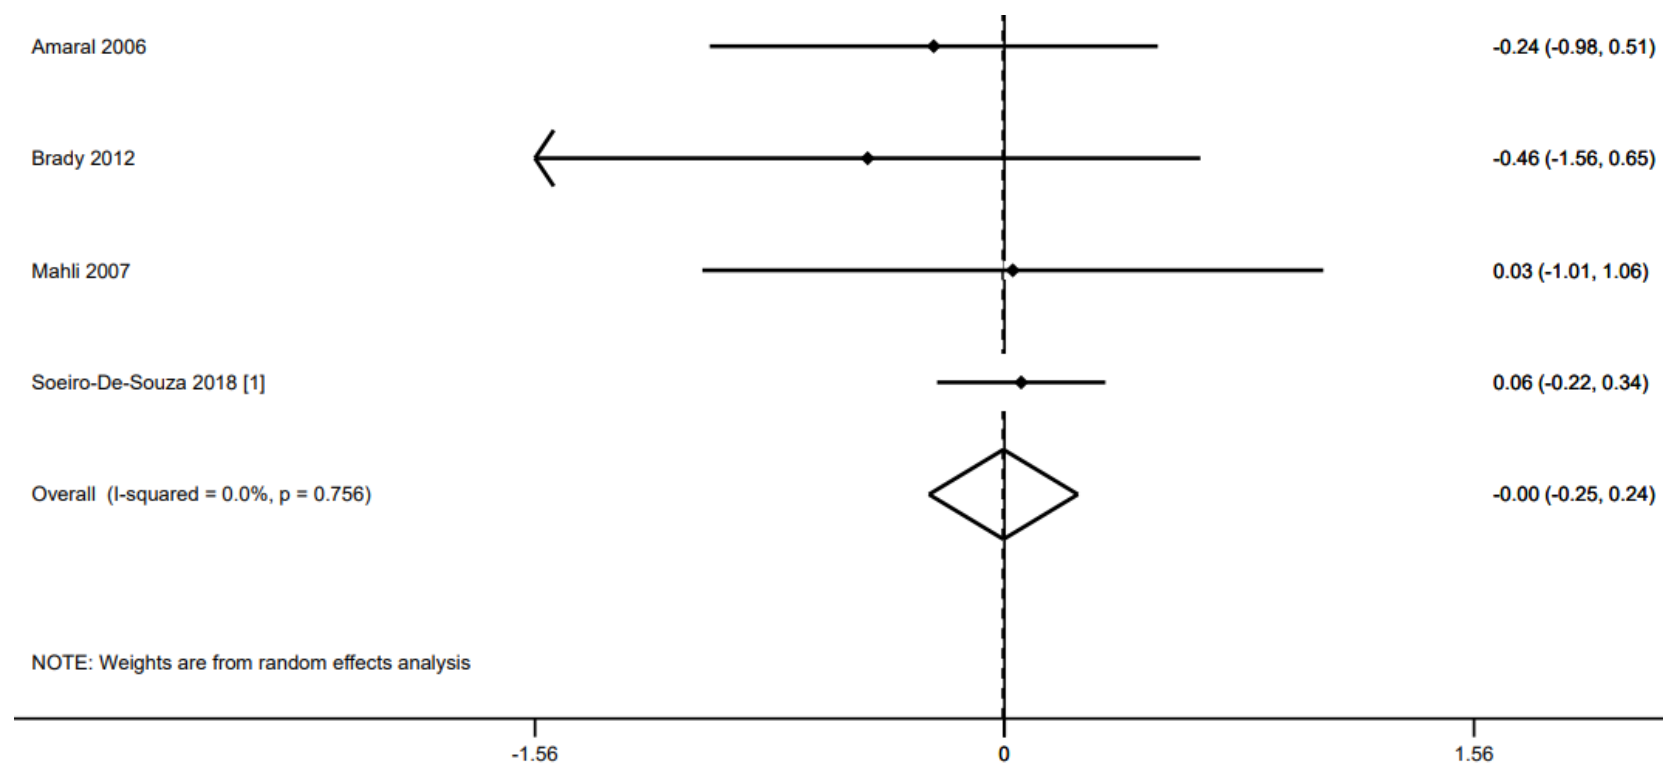

**PFC:**

Supplementary Figure S12: Studies SMDs of N-acetylaspartate differences between depressed BD patients and controls in the right wmPFC:

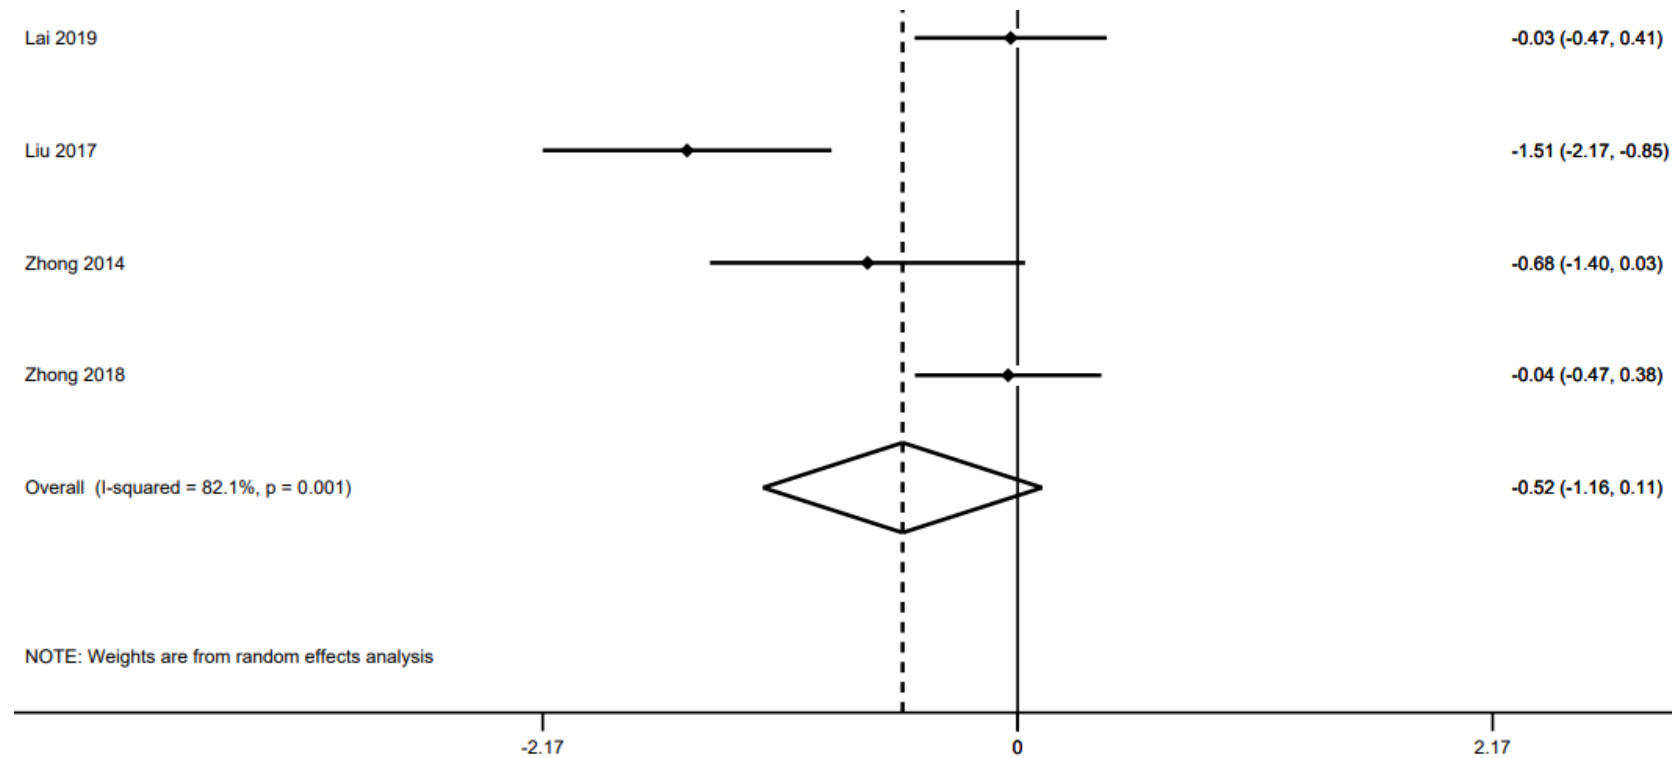

Supplementary Figure S13: Studies SMDs of N-acetylaspartate differences between depressed BD patients and controls in the left dlPFC:

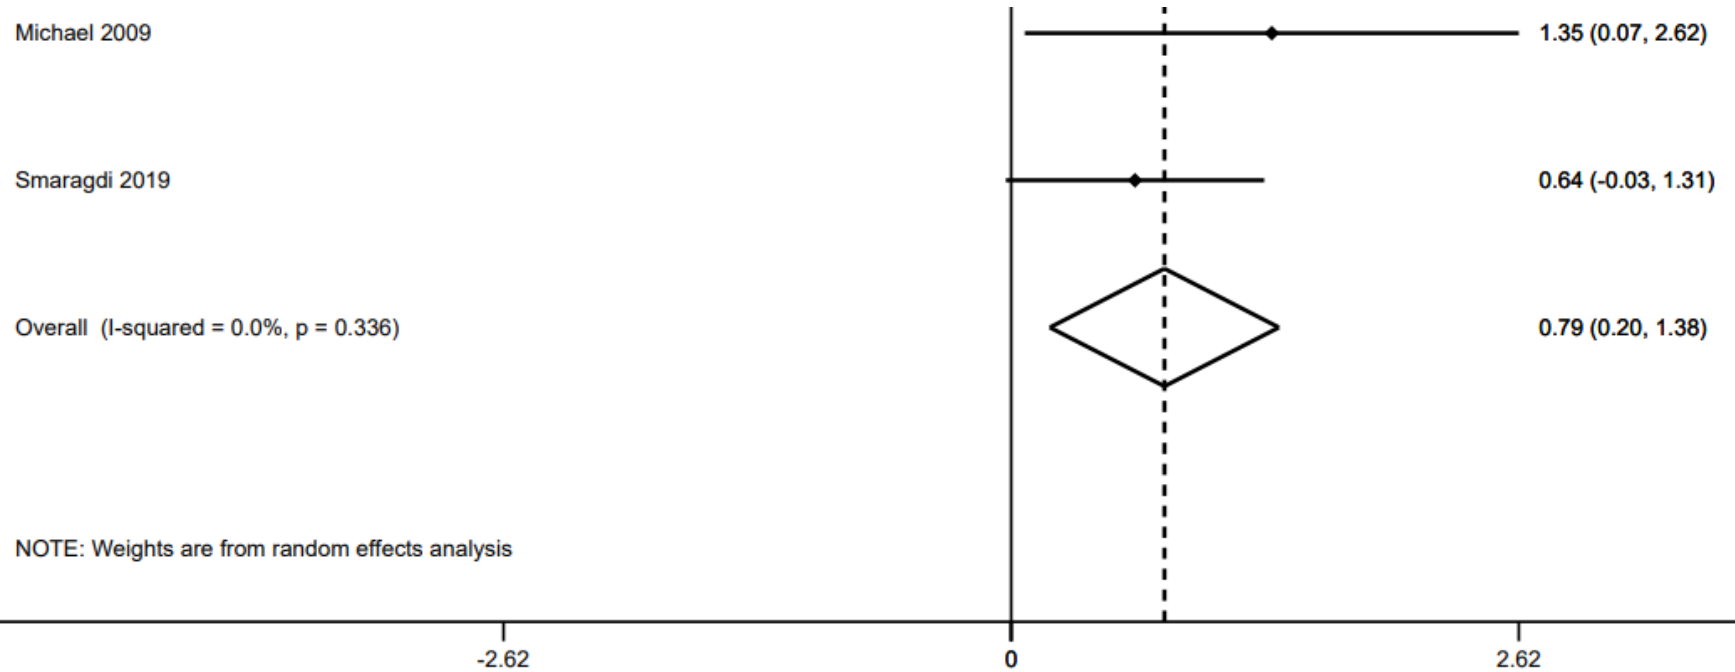



Supplementary Figure S14: Studies SMDs of N-acetylaspartate differences between euthymic BD patients and controls in the left dlPFC:

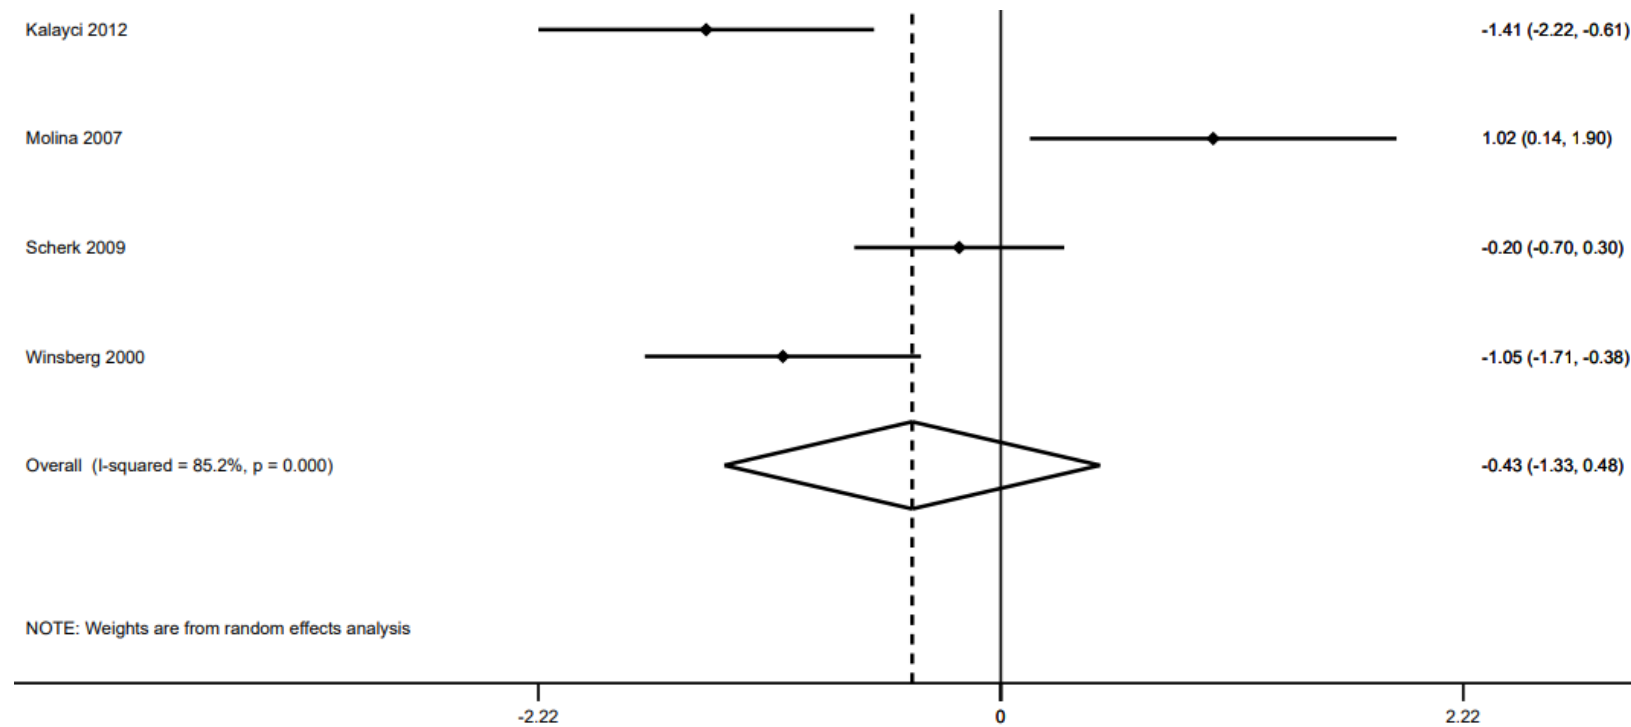

Supplementary Figure S15A: Studies SMDs of N-acetylaspartate differences between euthymic BD patients and controls in the right dlPFC:

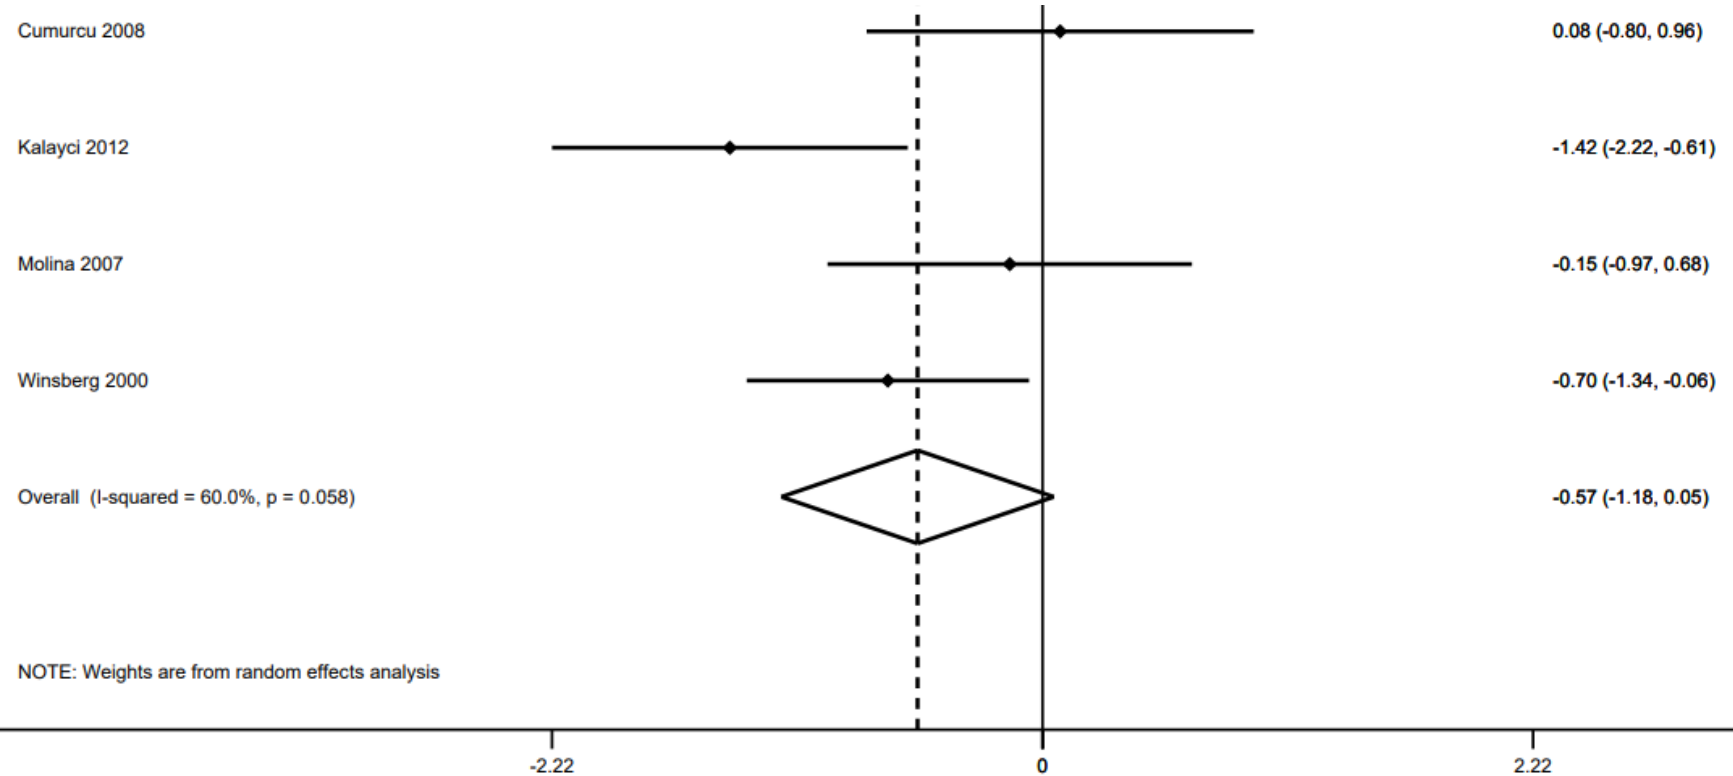

Supplementary Figure S15B: Studies SMDs of N-acetylaspartate differences between euthymic BD patients and controls in the right dlPFC according to the quantification methodology:

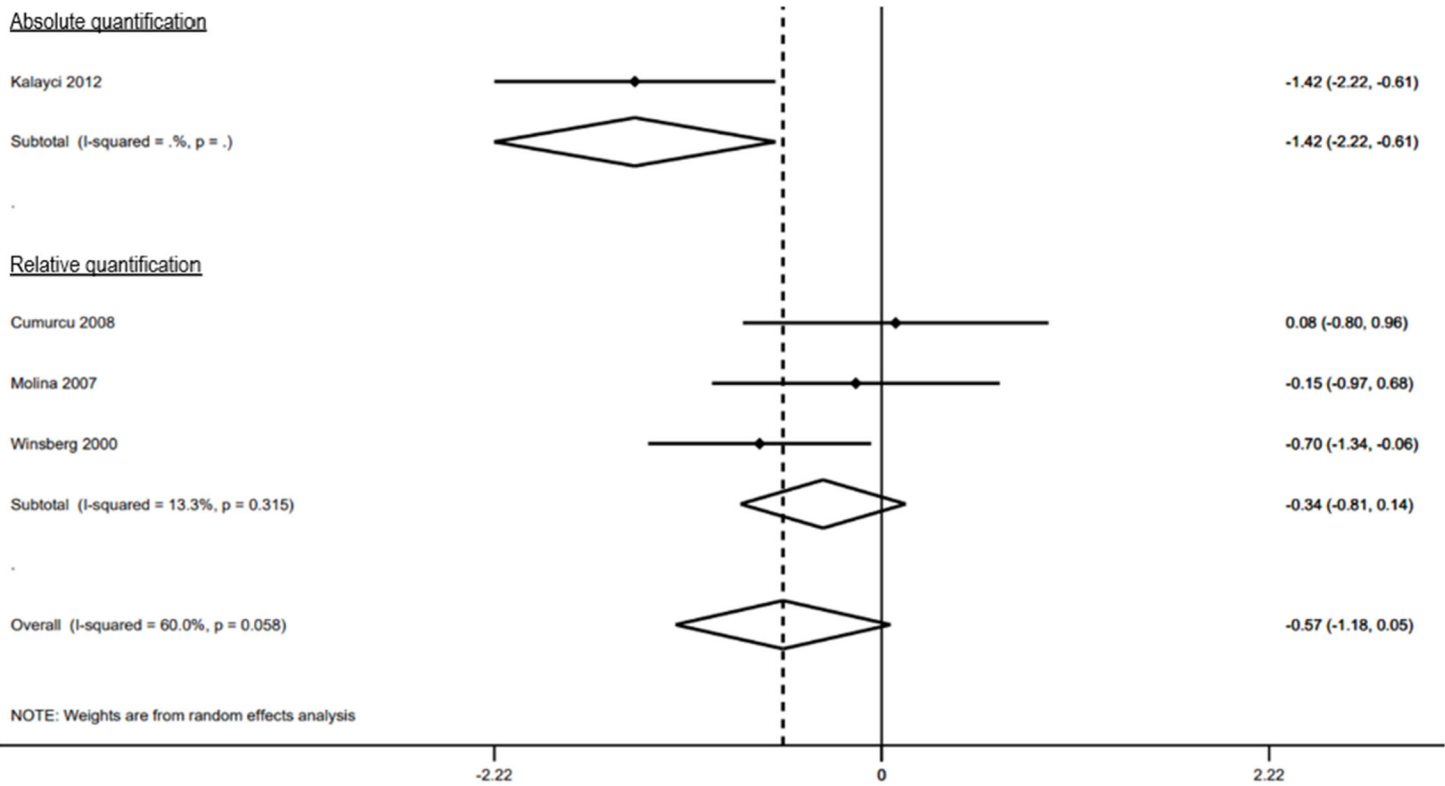

Supplementary Figure S16: Studies SMDs of Glx differences between depressed BD patients and controls in the left dlPFC:

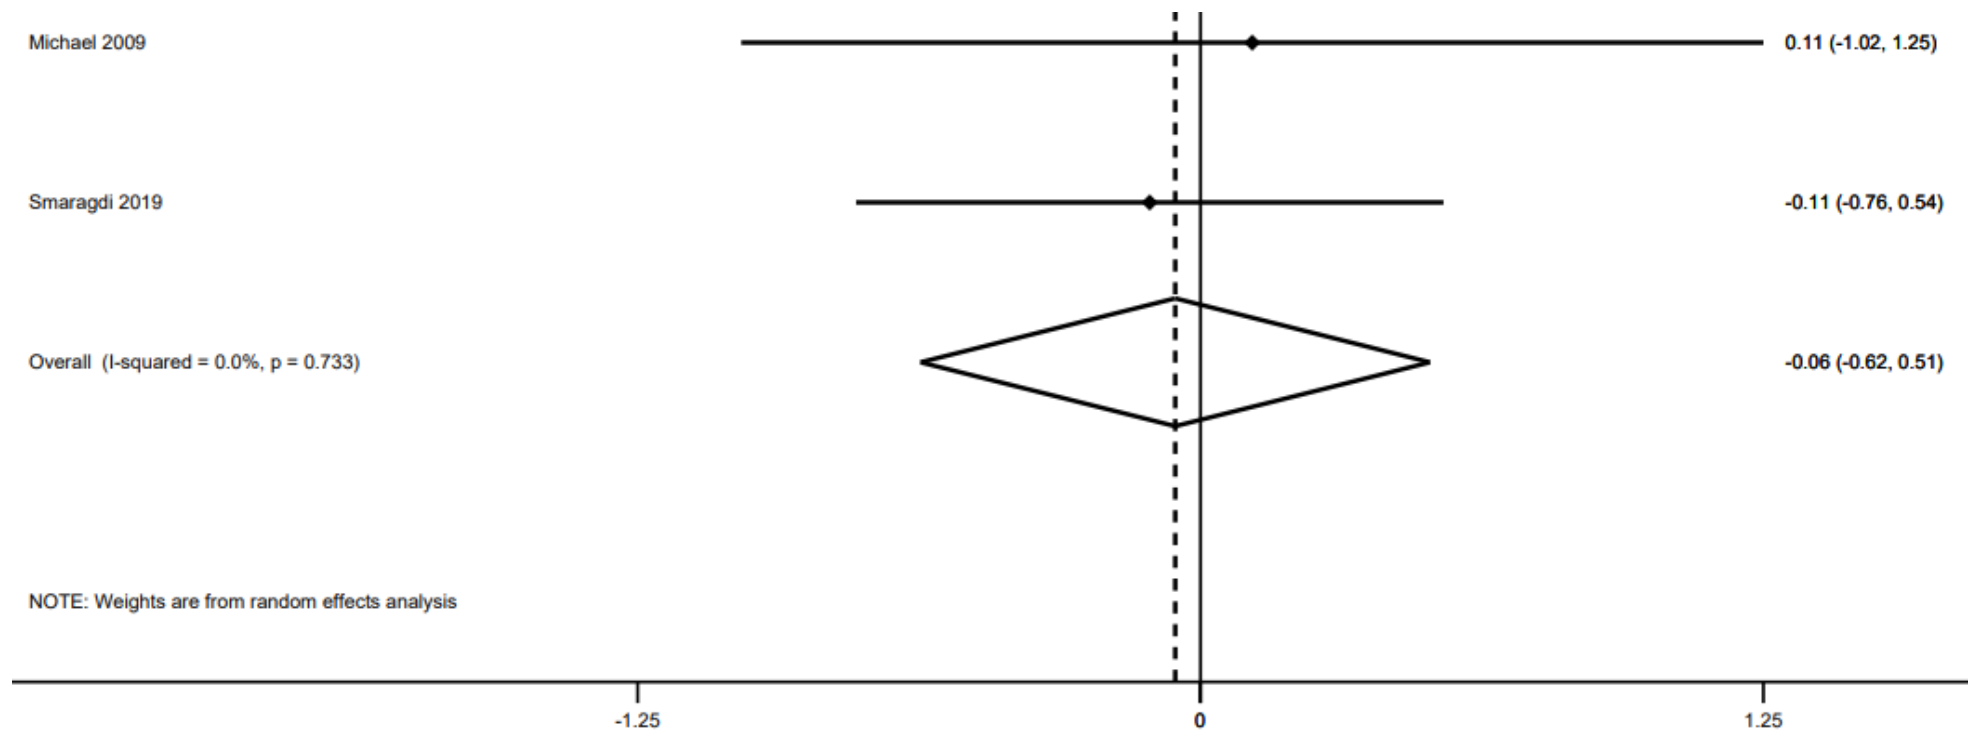

Supplement: s1 [file s1]
